# Supplementary material for: Molecular mechanisms of nutlin-3 involve acetylation of p53, histones and heat shock proteins in acute myeloid leukemia
Source: Mol Cancer. 2014 May 21;13:116. doi: 10.1186/1476-4598-13-116 (PMC4032636; doi:10.1186/1476-4598-13-116)
Supplement: Additional file 2: Table S1 — A complete list of proteins identified using MaxQuant (version 1.2.2.5) from experiments using anti-acetyl-lysine immunoprecipitation and SILAC (stable isotope labeling with amino acids in cell culture) analysis of MOLM-13 cells treated with nutlin-3. [file 1476-4598-13-116-S2.xls]

## Sheet: Supplementary table 1
																					Slice from 1D gel
Leading protein	id	Peptide IDs	Oxidation (M) Site IDs	Oxidation (M) Site Positions	Protein IDs	Majority Protein IDs	Peptide Counts (all)	Peptide Counts (razor+unique)	Peptide Counts (unique)	Protein Names	Gene Names	Protein Descriptions	Uniprot	Proteins	Peptides	Razor + unique Peptides	Unique Peptides	Unique + Razor Sequence Coverage [%]	Unique Sequence Coverage [%]	Mol. Weight [kDa]	3	4	5	6	7	8	9	10	11	12	13	14	PEP	Ratio H/L (raw)	Ratio H/L Normalized*	Ratio H/L Variability [%]	Ratio H/L Count	Intensity	Intensity L	Intensity H	Only identified by site	Reverse	Contaminant
Q9NP29	211	586;742			IPI00385143;IPI00943265;IPI00386133;IPI00386132;IPI00387120	IPI00385143;IPI00943265;IPI00386133;IPI00386132;IPI00387120	2;1;1;1;1	2;1;1;1;1	2;1;1;1;1	Microfibrillar protein 2;Ig kappa chain V-IV region;Ig kappa chain V-IV region B17;Ig kappa chain V-IV region JI;Ig kappa chain V-IV region Len	IGKV4-1	Microfibrillar protein 2 (Fragment);Similar to Ig kappa chain V-IV region precursor;Ig kappa chain V-IV region B17;Ig kappa chain V-IV region JI;Ig kappa chain V-IV region Len	Q9NP29;P06312;P06314;P06313;P01625	5	2	2	2	18.5	18.5	13.688							3			1			7.89e-23	0.0017981	0.0043079	246.76	4	27171000	26561000	609650
P01605	212	134;585	145	4	IPI00387097;IPI00940069;IPI00936553;IPI00385253;IPI00892594;IPI00945429;IPI00829834;IPI00549330;IPI00387119;IPI00384401	IPI00387097;IPI00940069;IPI00936553;IPI00385253;IPI00892594;IPI00945429;IPI00829834;IPI00549330;IPI00387119;IPI00384401	2;1;1;1;1;1;1;1;1;1	2;1;1;1;1;1;1;1;1;1	2;1;1;1;1;1;1;1;1;1	Ig kappa chain V-I region Lay;Ig kappa chain C region;Ig kappa chain V-III region CLL;Rheumatoid factor;Ig kappa chain V-III region VH;Myosin-reactive immunoglobulin light chain variable region;Ig kappa chain V-III region POM;Myosin-reactive immunoglobulin kappa chain variable region	IGKC	Ig kappa chain V-I region Lay;Ig kappa chain C region;similar to hCG2043206;Ig kappa chain V-III region CLL;similar to hCG2043206;Putative uncharacterized protein ENSP00000394837;Ig kappa chain V-III region VH (Fragment);Myosin-reactive immunoglobulin ligh	P01605;P01834;P04207;C9JP95;P04434;Q9UL83;P01624;Q9UL85	10	2	2	2	25	25	11.834							3						1.07e-07	0.017567	0.039694	153.12	3	4211600	3860900	350720
P15924-1	85	580;933	64	984	IPI00013933;IPI00217182	IPI00013933;IPI00217182	2;2	2;2	2;2	250/210 kDa paraneoplastic pemphigus antigen;Desmoplakin;cDNA FLJ53584, highly similar to Desmoplakin;cDNA FLJ51487, highly similar to Desmoplakin;cDNA FLJ61543, highly similar to Desmoplakin;DSP variant protein	DSP;DSP variant protein	Isoform DPI of Desmoplakin;Isoform DPII of Desmoplakin	P15924-1;P15924;P15924-2;B4DKX6;B4DWT7;B4E2A0;Q4LE79	2	2	2	2	1.2	1.2	331.77	2												4.01e-06	0.017846	0.041116	NaN	1	3399300	3367300	32011
A2NJV5	247	248;249			IPI00743194;IPI00829600;IPI00550731;IPI00939996;IPI00829947;IPI00829663;IPI00893819;IPI00827829;IPI00953695;IPI00387107;IPI00384397;IPI00827773;IPI00736885;IPI00854709;IPI00922330	IPI00743194;IPI00829600;IPI00550731;IPI00939996;IPI00829947;IPI00829663;IPI00893819;IPI00827829;IPI00953695;IPI00387107;IPI00384397;IPI00827773;IPI00736885;IPI00854709;IPI00922330	2;2;1;1;1;1;1;1;1;1;1;1;1;1;1	2;2;1;1;1;1;1;1;1;1;1;1;1;1;1	2;2;1;1;1;1;1;1;1;1;1;1;1;1;1	Kappa light chain variable region;Putative uncharacterized protein;Ig kappa chain V-II region RPMI 6410;HRV Fab N8-VL;Ig kappa chain V-II region GM607;Ig kappa chain V-II region Cum;Myosin-reactive immunoglobulin light chain variable region;Cold agglutinin FS-1 L-chain;Ig kappa chain V-II region TEW;Burkitts lymphoma translocation t(2;8) encoding kappa light chain, . Chromosome 8q+ break point.	IGKV A18	Kappa light chain variable region (Fragment);Putative uncharacterized protein ENSP00000374803;Putative uncharacterized protein;Ig kappa chain V-II region RPMI 6410;Putative uncharacterized protein ENSP00000419353;13 kDa protein;13 kDa protein;HRV Fab N8-VL	A2NJV5;A6NFM8;Q8TCD0;P06310;C9JV92;A2IPI1;P06309;P01614;Q9UL80;A2NB45;P01617;A0N2N3;A6NK26;B7ZMG8	15	2	2	2	16.5	16.5	13.182							3			1			8.87e-09	0.028603	0.058857	95.538	3	29373000	25155000	4217600
P06702	125	145;689			IPI00027462;IPI00939362	IPI00027462;IPI00939362	2;2	2;2	2;2	Calgranulin-B;Calprotectin L1H subunit;Leukocyte L1 complex heavy chain;Migration inhibitory factor-related protein 14;Protein S100-A9;S100 calcium-binding protein A9;cDNA, FLJ92148, highly similar to Homo sapiens S100 calcium binding protein A9 (calgranulin B) (S100A9), mRNA;Putative uncharacterized protein S100A9	CAGB;CFAG;MRP14;S100A9	Protein S100-A9;Putative uncharacterized protein S100A9	P06702;B2R4M6;C9J1H1	2	2	2	2	19.3	19.3	13.242	2			3									8.87e-28	0.054119	0.11611	NaN	1	12300000	12194000	106430
O43684	80	900;969			IPI00013468;IPI00514701;IPI00644108;IPI00644568	IPI00013468;IPI00514701;IPI00644108;IPI00644568	2;2;2;1	2;2;2;1	2;2;2;1	Mitotic checkpoint protein BUB3;cDNA FLJ57899, highly similar to Mitotic checkpoint protein BUB3;Putative uncharacterized protein BUB3	BUB3	Mitotic checkpoint protein BUB3;budding uninhibited by benzimidazoles 3 isoform b;Putative uncharacterized protein BUB3;Putative uncharacterized protein BUB3	O43684;B4DDM6;A6NJ42;B5MCE8;A6NGZ9	4	2	2	2	10.4	10.4	37.154								2					4.75e-06	0.19991	0.36198	55.35	2	1172000	905390	266640
P62753	105	133;468			IPI00021840;IPI00643522;IPI00382475	IPI00021840;IPI00643522;IPI00382475	2;2;2	2;2;2	2;2;2	40S ribosomal protein S6;Phosphoprotein NP33;cDNA FLJ78049, highly similar to Homo sapiens ribosomal protein S6 (RPS6), mRNA;cDNA, FLJ92127, Homo sapiens ribosomal protein S6 (RPS6), mRNA;Ribosomal protein S6;Ribosomal protein S6, isoform CRA_e;Ribosomal protein S6, isoform CRA_a;PNAS-20	OK/SW-cl.2;RPS6;hCG_1741512;RP11-513M16.6-001;RP11-513M16.6-002	40S ribosomal protein S6;Ribosomal protein S6, isoform CRA_a;PNAS-20	P62753;A2A3R6;Q96DV6;A2A3R5;Q9BZU1	3	2	2	2	6.4	6.4	28.68									2			1	0.00010561	0.26313	0.5639	17.037	3	1161000	845370	315680
O00203-1	100	579;1054			IPI00021129;IPI00397887	IPI00021129;IPI00397887	2;1	2;1	2;1	Adapter-related protein complex 3 subunit beta-1;Adaptor protein complex AP-3 subunit beta-1;AP-3 complex subunit beta-1;Beta-3A-adaptin;Clathrin assembly protein complex 3 beta-1 large chain;cDNA FLJ76822, highly similar to Homo sapiens adaptor-related protein complex 3, beta 1 subunit (AP3B1), mRNA;Adaptor-related protein complex 3 beta 1 subunit;cDNA FLJ51426, highly similar to Adapter-related…	ADTB3A;AP3B1	Isoform 1 of AP-3 complex subunit beta-1;cDNA FLJ51426, highly similar to Adapter-related protein complex 3 beta-1 subunit	O00203-1;O00203;A8K586;Q3MNE1;O00203-2;B4E0B2	2	2	2	2	2.7	2.7	121.32			1					1					0.00066824	0.24129	0.58341	8.7592	2	803740	644990	158750
C9JZW1	254	241;720;899			IPI00947070;IPI00856049;IPI00945264	IPI00947070;IPI00856049;IPI00945264	3;3;3	2;2;2	2;2;2	60S ribosomal protein L22-like 1;Putative uncharacterized protein RPL22L1	RPL22L1	Putative uncharacterized protein RPL22L1;60S ribosomal protein L22-like 1;Putative uncharacterized protein RPL22L1	C9JZW1;Q6P5R6;C9JYQ9	3	3	2	2	25.4	25.4	16.9												3	1.17e-29	0.25164	0.58989	19.414	3	6062700	4764500	1298200
Q6B6N3	248	359;587			IPI00926935;IPI00748145;IPI00095891;IPI00646491;IPI00788932;IPI00640867;IPI00514055;IPI00006395;IPI00219835;IPI00644936;IPI00248911;IPI00337415;IPI00220281;IPI00217269;IPI00220578;IPI00398700;IPI00218488;IPI00925504;IPI00217906;IPI00925691;IPI00924427;IPI00794986;IPI00796250;IPI00329305;IPI00644474;IPI00792774;IPI00647637;IPI00941962	IPI00926935;IPI00748145;IPI00095891;IPI00646491;IPI00788932;IPI00640867;IPI00514055;IPI00006395;IPI00219835;IPI00644936;IPI00248911;IPI00337415;IPI00220281;IPI00217269;IPI00220578;IPI00398700;IPI00218488;IPI00925504;IPI00217906;IPI00925691;IPI00924427;IPI00794986;IPI00796250;IPI00329305;IPI00644474;IPI00792774;IPI00647637;IPI00941962	2;2;1;1;1;1;1;1;1;1;1;1;1;1;1;1;1;1;1;1;1;1;1;1;1;1;1;1	2;2;1;1;1;1;1;1;1;1;1;1;1;1;1;1;1;1;1;1;1;1;1;1;1;1;1;1	2;2;1;1;1;1;1;1;1;1;1;1;1;1;1;1;1;1;1;1;1;1;1;1;1;1;1;1	Galphai2 protein;Adenylate cyclase-inhibiting G alpha protein;Guanine nucleotide-binding protein G(i) subunit alpha-2;GTP-binding regulatory protein Gi alpha-2 chain;GNAI2 protein;Guanine nucleotide binding protein (G protein), alpha inhibiting activity polypeptide 2;Adenylate cyclase-stimulating G alpha protein;Extra large alphas protein;Guanine nucleotide-binding protein G(s) subunit alpha isof…	GNAI2;GNAI2B;WUGSC:H_LUCA16.1;GNAS;GNAS1;GNAL;hCG_1780858;GSP;hCG_1788380;GNAT3;GNAI1;GNAO1;GNAT2;GNATC;cone transducin alpha subunit;hCG_40256;RP5-1160K1.4-001;GNAI3;hCG_1997731;RP5-1160K1.2-001;DKFZp686O0962;GNAT1;GNATR;hCG_1997820;WUGSC:H_LUCA15.1;RP4-543J19.6-036;RP4-543J19.6-037;RP4-543J19.6-038;RP4-543J19.6-021	Galphai2 protein;Isoform 1 of Guanine nucleotide-binding protein G(i), alpha-2 subunit;Isoform XLas-1 of Guanine nucleotide-binding protein G(s) subunit alpha isoforms XLas;Isoform XLas-2 of Guanine nucleotide-binding protein G(s) subunit alpha isoforms XL	Q6B6N3;P04899-1;P04899;Q93020;Q96C71;Q5JWF2-1;Q5JWF2;Q5JWF2-2;Q86XU3;A6NI00;Q5FWY2;P63092-1;P63092;B0AZR9;P38405;A8K1Y9;B4DHG7;Q8N2B4;P63092-2;P63092-3;A8MTJ3;B9EJG5;P63096;B4E2V1;O43383;P09471-1;P09471;B3KP89;Q8N6I9;P19087;Q16162;Q5T697;P08754;Q5TZX1;P09471-2;Q6AWC5;P11488;B3KTZ0;P04899-2;B3KX51;B4DYA0;B3KP24;B4E2X5;Q6LCB5;Q5JWE8;Q5JWE9;Q5JWD1;A2A2R6	28	2	2	2	7.1	7.1	41.548								2					0.00079932	0.28355	0.60461	14.524	2	2631500	1463800	1167700
P09874	233	281;833;925;984			IPI00449049;IPI00953994	IPI00449049	4;1	4;1	4;1	NAD(+) ADP-ribosyltransferase 1;Poly [ADP-ribose] polymerase 1;Poly[ADP-ribose] synthase 1;cDNA, FLJ92658, highly similar to Homo sapiens poly (ADP-ribose) polymerase family, member 1 (PARP1), mRNA;cDNA FLJ53442, highly similar to Poly (ADP-ribose) polymerase 1 (EC 2.4.2.30);PARP1 protein;Poly(ADP-ribose) polymerase	ADPRT;PARP1;PPOL	Poly [ADP-ribose] polymerase 1	P09874;B1ANJ4;B2R5W3;B4E0E1;Q05D33;Q96P95	2	4	4	4	5.5	5.5	113.08		5											1.06e-07	0.30166	0.66077	20.214	5	3580200	2624000	956190
Q9Y6A4	30	116;647;648;785			IPI00001655;IPI00910720	IPI00001655;IPI00910720	4;2	4;2	4;2	Transcription factor IIB;UPF0468 protein C16orf80;cDNA FLJ58848, highly similar to Homo sapiens transcription factor IIB	C16orf80	UPF0468 protein C16orf80;cDNA FLJ58848, highly similar to Homo sapiens transcription factor IIB	Q9Y6A4;B4DN94	2	4	4	4	16.6	16.6	22.774											4		1.89e-09	0.29867	0.66521	19.854	4	2795300	1998800	796580
Q9UJV9	55	28;242;455;806			IPI00007208	IPI00007208	4	4	4	DEAD box protein 41;DEAD box protein abstrakt homolog;Probable ATP-dependent RNA helicase DDX41;cDNA FLJ34455 fis, clone HLUNG2002648, highly similar to Probable ATP-dependent RNA helicase DDX41 (EC 3.6.1.-);DEAD (Asp-Glu-Ala-Asp) box polypeptide 41, isoform CRA_a;DEAD-box protein abstrakt variant	ABS;DDX41;hCG_2039392	Probable ATP-dependent RNA helicase DDX41	Q9UJV9;B3KRK2;Q53HI2	1	4	4	4	8.7	8.7	69.837			4										2.44e-07	0.28571	0.67505	9.1652	4	6882700	3620000	3262800
P26373	217	563;832			IPI00465361;IPI00397611	IPI00465361;IPI00397611	2;2	2;2	2;2	60S ribosomal protein L13;Breast basic conserved protein 1;Ribosomal protein L13	BBC1;OK/SW-cl.46;RPL13;hCG_1723872	60S ribosomal protein L13;24 kDa protein	P26373;A8K4C8;B4DLX3;O60250;Q6NZ55	2	2	2	2	3.8	3.8	24.261											3		0.035576	0.40166	0.67761	33.329	3	780510	507420	273100
Q92614-1	203	38;69;130;393;430;431;542;543;609;615;618;733;748;768;788;789;891;897;1008;1055	139;140;141;142	1567;1611;1671;1811	IPI00760846;IPI00828082;IPI00334410;IPI00760925;IPI00827840	IPI00760846;IPI00828082;IPI00334410;IPI00760925;IPI00827840	20;20;20;19;18	20;20;20;19;18	20;20;20;19;18	Molecule associated with JAK3 N-terminus;Myosin containing a PDZ domain;Myosin-XVIIIa;SP-A receptor subunit SP-R210 alphaS;cDNA FLJ59649, highly similar to Myosin-18A;cDNA FLJ16503 fis, clone FEBRA2008681, highly similar to Myosin-18A;HCG27198, isoform CRA_a;cDNA FLJ59676, highly similar to Myosin-18A;cDNA FLJ60372, highly similar to Myosin-18A;cDNA FLJ60377, highly similar to Myosin-18A;Jak3 N-t…	KIAA0216;MYO18A;MYSPDZ;hCG_27198;MAJN	Isoform 1 of Myosin-XVIIIa;Isoform 4 of Myosin-XVIIIa;Isoform 2 of Myosin-XVIIIa;Isoform 3 of Myosin-XVIIIa;cDNA FLJ60372, highly similar to Myosin-18A	Q92614-1;Q92614;Q92614-4;Q5QD01;Q92614-2;Q92614-3;B4E0T8;Q92614-5;B3KVF8;B4DFN7;B4DYM1;B4DZ32;Q9NYE8	5	20	20	20	15.2	15.2	233.11	25	7	1										4.63e-149	0.29431	0.67788	24.893	33	149210000	108220000	40988000
A7MAP0	250	43;676			IPI00867509;IPI00943173;IPI00798401;IPI00797709	IPI00867509;IPI00943173;IPI00798401;IPI00797709	2;2;2;1	2;2;2;1	2;2;2;1	Coronin-1C_i2 protein;Coronin-1C_i3 protein;cDNA FLJ13143 fis, clone NT2RP3003230, highly similar to Coronin-1C;Coronin, actin binding protein, 1C variant;Coronin-1C;Coronin-3;hCRNN4;cDNA FLJ51205, highly similar to Coronin-1C;cDNA, FLJ79403, highly similar to Coronin-1C;cDNA, FLJ78964, highly similar to Coronin-1C;cDNA FLJ50992, highly similar to Coronin-1C	CORO1C;CRNN4	Coronin-1C_i3 protein;Coronin-1C;cDNA FLJ50992, highly similar to Coronin-1C;18 kDa protein	A7MAP0;A7MAP1;B3KN06;Q53G58;Q59EA2;Q9ULV4;B4E3S0;B7Z9V0;B4DMH3	4	2	2	2	4.9	4.9	58.947					2								3.47e-16	0.32812	0.69125	12.765	2	4034100	2832200	1201900
Q14331	41	460;1082			IPI00004655	IPI00004655	2	2	2	FSHD region gene 1 protein;Protein FRG1	FRG1	Protein FRG1	Q14331	1	2	2	2	10.1	10.1	29.172									3				4.34e-10	0.28562	0.71495	16.713	3	6597300	4614100	1983200
P62263	121	365;380;381			IPI00026271	IPI00026271	3	3	3	40S ribosomal protein S14	PRO2640;RPS14	40S ribosomal protein S14	P62263	1	3	3	3	11.3	11.3	16.273												4	8.52e-05	0.30967	0.71584	25.311	4	3284400	2409500	874970
Q9H5Z1	135	66;854;932;1096			IPI00030288;IPI00642913;IPI00513682	IPI00030288;IPI00642913;IPI00513682	4;4;2	4;4;2	4;4;2	DEAH box protein 35;Probable ATP-dependent RNA helicase DHX35;cDNA FLJ59566, highly similar to Probable ATP-dependent RNA helicase DHX35 (EC 3.6.1.-);cDNA FLJ58559, highly similar to Probable ATP-dependent RNA helicase DHX35 (EC 3.6.1.-);DEAH (Asp-Glu-Ala-His) box polypeptide 35	C20orf15;DDX35;DHX35;RP4-616B8.3-002;RP4-616B8.3-005	Probable ATP-dependent RNA helicase DHX35;DEAH (Asp-Glu-Ala-His) box polypeptide 35;DEAH (Asp-Glu-Ala-His) box polypeptide 35	Q9H5Z1;B4DL08;B4E0J0;Q5THR1;Q5THQ9	3	4	4	4	6.3	6.3	78.909			4										1.77e-07	0.3088	0.72083	14.17	4	5028700	2055100	2973600
P57721-1	73	202;590	61	169	IPI00027970;IPI00410587;IPI00796337;IPI00216689;IPI00012066;IPI00550365;IPI00790627;IPI00016610;IPI00167750;IPI00101278;IPI00791223;IPI00470509;IPI00900327;IPI00410586;IPI00788837	IPI00027970;IPI00410587;IPI00796337;IPI00216689;IPI00012066;IPI00550365;IPI00790627;IPI00016610;IPI00167750;IPI00101278;IPI00791223;IPI00470509;IPI00900327;IPI00410586;IPI00788837	2;2;2;2;2;2;2;2;2;2;2;2;2;2;1	2;2;2;2;2;2;2;2;2;2;2;2;2;2;1	2;2;2;2;2;2;2;2;2;2;2;2;2;2;1	Alpha-CP3;Poly(rC)-binding protein 3;Poly(RC)-binding protein 2 isoform b variant;Poly(RC) binding protein 2;Poly(RC) binding protein 2, isoform CRA_d;Alpha-CP2;Heterogeneous nuclear ribonucleoprotein E2;Poly(rC)-binding protein 2;cDNA FLJ77432, highly similar to Homo sapiens poly(rC) binding protein 2 (PCBP2), transcript variant 2, mRNA;Poly(RC) binding protein 2, isoform CRA_b;Putative uncharac…	PCBP3;hCG_2017557;PCBP2;PCBP1;hCG_1776997	poly(rC) binding protein 3 isoform 1;Isoform 4 of Poly(rC)-binding protein 3;poly(rC) binding protein 2 isoform a;Poly(rC)-binding protein 2;poly(rC) binding protein 2 isoform b;Putative uncharacterized protein PCBP3;poly(rC) binding protein 2 isoform e;Po	P57721-1;P57721;P57721-4;Q59HD4;Q6IPF4;Q15366;A8K7X6;A8MX33;Q5MJP6;Q15365;Q53SS8;P57721-5;P57721-2;C9JH66;Q32Q82;Q68Y55;B4DLC0;B4DXP5;P57721-3;B4DRD7	15	2	2	2	9.2	9.2	39.465								2					1.28e-06	0.35969	0.74205	26.138	2	457750	306260	151490
P14317	120	178;801;807;808;971	99	285	IPI00026156;IPI00909846;IPI00908571;IPI00947326	IPI00026156;IPI00909846	5;5;1;1	5;5;1;1	5;5;1;1	Hematopoietic cell-specific LYN substrate 1;Hematopoietic lineage cell-specific protein;LckBP1;p75;cDNA FLJ59379, highly similar to Hematopoietic lineage cell-specific protein;cDNA FLJ59981, highly similar to Hematopoietic lineage cell-specific protein	HCLS1;HS1	Hematopoietic lineage cell-specific protein;cDNA FLJ59379, highly similar to Hematopoietic lineage cell-specific protein	P14317;Q6IBK9;B4DQ92;B4DTP2	4	5	5	5	18.1	18.1	53.983			9										6.26e-10	0.34621	0.74384	47.809	9	8321000	6314000	2007000
Q9BUQ0	152	352;483;654;721;1049	124;125	1;90	IPI00183626;IPI00334175;IPI00179964;IPI00556157;IPI00915400;IPI00915287;IPI00915299;IPI00384710;IPI00159072;IPI00470879;IPI00413691	IPI00183626;IPI00334175;IPI00179964;IPI00556157	5;5;5;4;1;1;1;1;1;1;1	5;5;5;4;1;1;1;1;1;1;1	5;5;5;4;1;1;1;1;1;1;1	Polypyrimidine tract binding protein 1;Polypyrimidine tract binding protein 1, isoform CRA_c;57 kDa RNA-binding protein PPTB-1;Heterogeneous nuclear ribonucleoprotein I;Polypyrimidine tract-binding protein 1;Polypyrimidine tract-binding protein 1 isoform c variant	hCG_20560;PTBP1;PTB	polypyrimidine tract-binding protein 1 isoform a;Isoform 2 of Polypyrimidine tract-binding protein 1;Isoform 1 of Polypyrimidine tract-binding protein 1;Polypyrimidine tract-binding protein 1 isoform c variant (Fragment)	Q9BUQ0;P26599-2;P26599;P26599-1;Q59H49	11	5	5	5	15.3	15.3	59.632				5									5.16e-37	0.30554	0.75269	19.642	5	10524000	7544500	2979600
Q96I25	149	176;852	123	170	IPI00176706;IPI00479589;IPI00646846;IPI00647772;IPI00647326	IPI00176706;IPI00479589;IPI00646846;IPI00647772;IPI00647326	2;2;2;1;1	2;2;2;1;1	2;2;2;1;1	45 kDa-splicing factor;RNA-binding motif protein 17;Splicing factor 45;cDNA, FLJ95864;Putative uncharacterized protein;RNA binding motif protein 17;RNA binding motif protein 17, isoform CRA_a	RBM17;SPF45;hCG_24832;RP11-414H17.9-003;RP11-414H17.9-009;RP11-414H17.9-005;RP11-414H17.9-007;RP11-414H17.9-006	Splicing factor 45;RNA binding motif protein 17;RNA binding motif protein 17;RNA binding motif protein 17;RNA binding motif protein 17	Q96I25;Q5W009;Q5W008;Q5W012;Q5W010;Q5W011	5	2	2	2	10.5	10.5	44.961						2							0.036584	0.36617	0.75651	45.931	2	5303200	3640800	1662400
Q06830	27	762;907			IPI00000874;IPI00640741;IPI00027350;IPI00909207;IPI00641244	IPI00000874;IPI00640741;IPI00027350;IPI00909207;IPI00641244	2;2;1;1;1	2;2;1;1;1	2;2;1;1;1	Natural killer cell-enhancing factor A;Peroxiredoxin-1;Proliferation-associated gene protein;Thioredoxin peroxidase 2;Thioredoxin-dependent peroxide reductase 2;cDNA, FLJ92164, highly similar to Homo sapiens peroxiredoxin 1 (PRDX1), mRNA;Natural killer cell-enhancing factor B;Peroxiredoxin-2;PRP;Thiol-specific antioxidant protein;Thioredoxin peroxidase 1;Thioredoxin-dependent peroxide reductase 1…	PAGA;PAGB;PRDX1;TDPX2;NKEFB;PRDX2;TDPX1	Peroxiredoxin-1;19 kDa protein;Peroxiredoxin-2;cDNA FLJ60461, highly similar to Peroxiredoxin-2;11 kDa protein	Q06830;B2R4P2;B5BU26;P32119;B4DF70	5	2	2	2	10.6	10.6	22.11							1			2			1.16e-06	0.42542	0.75712	39.697	3	2848900	1801800	1047100
P61247	228	11;82;979			IPI00419880;IPI00472119;IPI00942312	IPI00419880;IPI00472119;IPI00942312	3;3;2	3;3;2	3;3;2	40S ribosomal protein S3a;v-fos transformation effector protein;cDNA FLJ78591, highly similar to Homo sapiens ribosomal protein S3A (RPS3A), mRNA;cDNA FLJ51870, highly similar to 40S ribosomal protein S3a;Ribosomal protein S3A;Putative uncharacterized protein ENSP00000404946	FTE1;MFTL;RPS3A	40S ribosomal protein S3a;30 kDa protein;Putative uncharacterized protein ENSP00000404946	P61247;A8K4W0;B7Z3M5;Q6NXR8;C9JC00	3	3	3	3	14.4	14.4	29.945							1		3				1.73e-06	0.36171	0.77515	60.588	3	4849100	3269600	1579600
O00182-1	67	532;968			IPI00010477;IPI00293267;IPI00163684;IPI00794258;IPI00472523;IPI00456941;IPI00943216;IPI00903067	IPI00010477;IPI00293267;IPI00163684;IPI00794258;IPI00472523;IPI00456941;IPI00943216;IPI00903067	2;2;2;2;1;1;1;1	2;2;2;2;1;1;1;1	2;2;2;2;1;1;1;1	Ecalectin;Galectin-9;Tumor antigen HOM-HD-21;Lectin, galactoside-binding, soluble, 9 (Galectin 9), isoform CRA_f;Urate transporter isoform;cDNA FLJ44029 fis, clone TESTI4027557, highly similar to Galectin-9;Lectin, galactoside-binding, soluble, 9;Lectin, galactoside-binding, soluble, 9 (Galectin 9), isoform CRA_a;Urate transporter/channel protein;Galectin 9 short isoform variant;Lectin, galactosi…	LGALS9;hCG_1749919;HUAT;LGALS9B;LGALS9C	Isoform Long of Galectin-9;Isoform Short of Galectin-9;Lectin, galactoside-binding, soluble, 9 (Galectin 9), isoform CRA_b;cDNA FLJ52505, highly similar to Homo sapiens lectin, galactoside-binding, soluble 9, transcript variant short, mRNA;Isoform 1 of Gal	O00182-1;O00182;A7VJG6;O00182-2;B3KWW5;Q3B8N1;Q53FQ0;Q8WYQ7;B4DJD7;Q3B8N2-1;Q3B8N2;B4DKP4;Q6DKI2;C9JHN9;Q3B8N2-2	8	2	2	2	7.9	7.9	39.518									2				3.25e-07	0.36297	0.77785	NaN	1	696410	446970	249440
P62241	160	12;385;435;633			IPI00216587;IPI00645201	IPI00216587;IPI00645201	4;4	4;4	4;4	40S ribosomal protein S8;Ribosomal protein S8;Similar to ribosomal protein S8	OK/SW-cl.83;RPS8;hCG_2031852;RP11-269F19.3-001;RP11-269F19.3-003	40S ribosomal protein S8;Ribosomal protein S8	P62241;Q5JR94;Q5JR95;Q9BS10	2	4	4	4	26.4	26.4	24.205							4						1.82e-21	0.39214	0.78442	19.685	4	3638300	2281200	1357100
Q96HS1-1	142	30;42			IPI00788907;IPI00936922;IPI00063242;IPI00888849	IPI00788907;IPI00936922;IPI00063242;IPI00888849	2;2;2;1	2;2;2;1	2;2;2;1	Bcl-XL-binding protein v68;Phosphoglycerate mutase family member 5;Serine/threonine-protein phosphatase PGAM5, mitochondrial;Phosphoglycerate mutase 5, long isoform;Putative uncharacterized protein PXMP2	PGAM5;PGAM5-L;PXMP2	Isoform 1 of Serine/threonine-protein phosphatase PGAM5, mitochondrial;Putative uncharacterized protein PXMP2;Isoform 2 of Serine/threonine-protein phosphatase PGAM5, mitochondrial;16 kDa protein	Q96HS1-1;Q96HS1;A9LN06;C9IZY7;Q96HS1-2	4	2	2	2	10.4	10.4	32.004									2				9.99e-05	0.34096	0.79398	23.606	2	1114600	746960	367640
P18621	220	500;1093			IPI00413324;IPI00478208;IPI00644171;IPI00394699;IPI00878444;IPI00642149	IPI00413324;IPI00478208;IPI00644171;IPI00394699;IPI00878444;IPI00642149	2;2;1;1;1;1	2;2;1;1;1;1	2;2;1;1;1;1	60S ribosomal protein L17;60S ribosomal protein L23;PD-1;cDNA FLJ52184, highly similar to 60S ribosomal protein L17;Putative uncharacterized protein ENSP00000375160;Putative uncharacterized protein RPL17	RPL17	60S ribosomal protein L17;21 kDa protein;Putative uncharacterized protein RPL17P9;Putative uncharacterized protein RPL17;13 kDa protein;9 kDa protein	P18621;B4E3C2;A8MU02;B5ME31	6	2	2	2	11.4	11.4	21.397											2		3.67e-05	0.36142	0.7958	45.606	2	846410	560190	286220
O00571	154	186;345;859			IPI00215637;IPI00293616;IPI00910433;IPI00908506	IPI00215637;IPI00293616;IPI00910433;IPI00908506	3;3;2;2	3;3;2;2	3;3;2;2	ATP-dependent RNA helicase DDX3X;DEAD box protein 3, X-chromosomal;DEAD box, X isoform;Helicase-like protein 2;cDNA FLJ76819, highly similar to Homo sapiens DEAD (Asp-Glu-Ala-Asp) box polypeptide 3, X-linked (DDX3X), transcript variant 2, mRNA;DEAD (Asp-Glu-Ala-Asp) box polypeptide 3, X-linked;HCG19318, isoform CRA_a;cDNA FLJ60399, highly similar to ATP-dependent RNA helicase DDX3X (EC 3.6.1.-);D…	DBX;DDX3;DDX3X;hCG_19318;RP1-169I5.3-001;DBY;DDX3Y	ATP-dependent RNA helicase DDX3X;ATP-dependent RNA helicase DDX3Y;cDNA FLJ60675, highly similar to ATP-dependent RNA helicase DDX3X;cDNA FLJ53122, highly similar to ATP-dependent RNA helicase DDX3Y	O00571;A8K538;B4E3E8;B5BTY4;Q59GX6;Q5S4N1;O15523;B4DK29;B4DXX7;B4E010;B4DLU5;B4E132	4	3	3	3	5.1	5.1	73.243			3										4e-12	0.33259	0.80034	8.9125	3	2114000	1594400	519690
P52597	38	100;438;1046	33	345	IPI00003881	IPI00003881	3	2	2	Heterogeneous nuclear ribonucleoprotein F;Heterogeneous nuclear ribonucleoprotein F, N-terminally processed;Nucleolin-like protein mcs94-1;cDNA FLJ57121, highly similar to Heterogeneous nuclear ribonucleoprotein F	HNRNPF;HNRPF;OK/SW-cl.23	Heterogeneous nuclear ribonucleoprotein F	P52597;B4DKS8;Q8NI96	1	3	2	2	9.2	9.2	45.671						2							1.43e-46	0.40446	0.80074	23.273	2	4690000	2993000	1697000
Q9UHX1-6	253	92;99;115;275;318;376;453;454;507;554;745;754;777;824;991;998;1050;1061	177;178;179;180;181;182;183	15;71;121;144;148;241;261	IPI00855912;IPI00100716;IPI00856076;IPI00788826;IPI00069750;IPI00797595	IPI00855912;IPI00100716;IPI00856076;IPI00788826;IPI00069750;IPI00797595	18;17;17;17;16;16	18;17;17;17;16;16	18;17;17;17;16;16	60 kDa poly(U)-binding-splicing factor;FUSE-binding protein-interacting repressor;Poly(U)-binding-splicing factor PUF60;Ro-binding protein 1;Siah-binding protein 1	FIR;PUF60;ROBPI;SIAHBP1	Isoform 6 of Poly(U)-binding-splicing factor PUF60;Isoform 2 of Poly(U)-binding-splicing factor PUF60;Isoform 5 of Poly(U)-binding-splicing factor PUF60;Isoform 4 of Poly(U)-binding-splicing factor PUF60;Isoform 1 of Poly(U)-binding-splicing factor PUF60;I	Q9UHX1-6;Q9UHX1;Q9UHX1-2;Q9UHX1-5;Q9UHX1-4;Q9UHX1-1;Q9UHX1-3	6	18	18	18	55.2	55.2	55.399	12	4	28	26	9	9	4	5	2			3	2.76e-191	0.36473	0.80218	34.836	102	694080000	481380000	212710000
Q8IWX8	201	189;576			IPI00333010;IPI00642935	IPI00333010;IPI00642935	2;2	2;2	2;2	Calcium homeostasis endoplasmic reticulum protein;ERPROT 213-21;SR-related CTD-associated factor 6;cDNA FLJ51520, highly similar to Homo sapiens calcium homeostasis endoplasmic reticulum protein (CHERP), mRNA;cDNA FLJ51519, highly similar to Homo sapiens calcium homeostasis endoplasmic reticulum protein (CHERP), mRNA;Calcium homeostasis endoplasmic reticulum protein variant	CHERP;DAN26;SCAF6	Calcium homeostasis endoplasmic reticulum protein;cDNA FLJ51519, highly similar to Homo sapiens calcium homeostasis endoplasmic reticulum protein (CHERP), mRNA	Q8IWX8;B4DL82;B4DPM4;Q59ET1	2	2	2	2	2.8	2.8	103.57		3											0.0002301	0.2722	0.80567	12.389	3	7085100	5146600	1938500
Q3B867	76	56;174;835;836	59	72	IPI00642904;IPI00012726;IPI00555747;IPI00642944;IPI00641299;IPI00644016	IPI00642904;IPI00012726;IPI00555747;IPI00642944;IPI00641299	4;4;4;4;2;1	2;2;2;2;2;0	2;2;2;2;2;0	PABPC4 protein;Poly(A) binding protein, cytoplasmic 4 (Inducible form);Poly(A) binding protein, cytoplasmic 4 (Inducible form), isoform CRA_c;PABPC4 protein variant;Activated-platelet protein 1;Inducible poly(A)-binding protein;Polyadenylate-binding protein 4;Poly(A) binding protein, cytoplasmic 4 (Inducible form), isoform CRA_e;Polyadenylate binding protein II	PABPC4;hCG_2031827;RP11-69E11.6-002;APP1;PABP4;RP11-69E11.6-004;RP11-69E11.6-003;RP11-69E11.6-013	poly A binding protein, cytoplasmic 4 isoform 1;Isoform 1 of Polyadenylate-binding protein 4;Isoform 2 of Polyadenylate-binding protein 4;Poly(A) binding protein, cytoplasmic 4 (Inducible form), isoform CRA_e;PABPC4 protein variant	Q3B867;Q4VC03;Q53GL4;Q6IQ30;Q13310-1;Q13310;Q13310-2;B1ANR7;Q147Y3;B1ANR0;Q15164;B1ANR5;Q59GZ7	6	4	2	2	2.6	2.6	72.39			2										7.59e-06	0.31988	0.80727	25.853	2	541660	392810	148840
B0I1T2-1	229	72;111;136;163;175;195;375;400;539;565;567;596;684;798;962;995	162	819	IPI00420004;IPI00895957;IPI00895883;IPI00925127;IPI00895790;IPI00945499	IPI00420004;IPI00895957	16;9;7;6;1;1	16;9;7;6;1;1	16;9;7;6;1;1	Minor histocompatibility antigen HA-2;Myosin-Ig;Myosin-IG (Myosin-1G)(Fragment).	MYO1G;FLJ00293	Isoform 1 of Myosin-Ig;Isoform 4 of Myosin-Ig	B0I1T2-1;B0I1T2;Q6ZNK5;B0I1T2-4	6	16	16	16	23.1	23.1	116.44		20											2.71e-76	0.34381	0.8099	25.184	20	50543000	34799000	15744000
P37108	183	0;1021			IPI00293434;IPI00878369;IPI00942616;IPI00788736;IPI00790432;IPI00789296	IPI00293434;IPI00878369;IPI00942616;IPI00788736;IPI00790432;IPI00789296	2;1;1;1;1;1	2;1;1;1;1;1	2;1;1;1;1;1	18 kDa Alu RNA-binding protein;Signal recognition particle 14 kDa protein;Putative uncharacterized protein ENSP00000397549;Putative uncharacterized protein ENSP00000416419	SRP14	Signal recognition particle 14 kDa protein;Putative uncharacterized protein ENSP00000397549;Putative uncharacterized protein ENSP00000416419;9 kDa protein;10 kDa protein;8 kDa protein	P37108;C9J8B3;C9JG78	6	2	2	2	31.6	31.6	14.57											1	2	1.5e-18	0.34559	0.81012	NaN	1	1400000	943260	456700
P62701	162	623;914;1031;1090			IPI00217030;IPI00219894	IPI00217030;IPI00219894	4;2	4;2	4;2	40S ribosomal protein S4, X isoform;SCR10;Single copy abundant mRNA protein;cDNA FLJ40595 fis, clone THYMU2010705, highly similar to 40S RIBOSOMAL PROTEIN S4, X ISOFORM;cDNA, FLJ92004, Homo sapiens ribosomal protein S4, X-linked (RPS4X), mRNA;Ribosomal protein S4, X-linked, isoform CRA_c;Ribosomal protein S4, X-linked X isoform variant;RPS4X protein;40S ribosomal protein S4, Y isoform 2	CCG2;RPS4;RPS4X;SCAR;hCG_18634;RPS4Y2;RPS4Y2P	40S ribosomal protein S4, X isoform;40S ribosomal protein S4, Y isoform 2	P62701;B2R491;Q53HV1;Q96IR1;Q8TD47	2	4	4	4	12.2	12.2	29.597							4		5				4.11e-19	0.38263	0.81808	35.712	9	10494000	6575900	3918100
B0I1S2	205	93;199;220;465;767			IPI00926581;IPI00941217;IPI00607818;IPI00337335;IPI00607778;IPI00029818	IPI00926581;IPI00941217;IPI00607818;IPI00337335;IPI00607778;IPI00029818	5;5;5;5;3;3	2;2;2;2;2;2	2;2;2;2;2;2	MYH14 variant protein;Myosin heavy chain 14;Myosin heavy chain, non-muscle IIc;Myosin-14;Non-muscle myosin heavy chain IIc;Nonmuscle myosin heavy chain II-C variant;MYH14 protein;cDNA FLJ43092 fis, clone COLON2002520, highly similar to Myosin-14;cDNA FLJ56368, highly similar to Myosin-14;Myosin;cDNA FLJ16179 fis, clone BRHIP3000070, highly similar to Myosin-14	FP17425;KIAA2034;MYH14	myosin, heavy chain 14 isoform 3;Isoform 2 of Myosin-14;myosin, heavy chain 14 isoform 1;Isoform 1 of Myosin-14;Isoform 4 of Myosin-14;Isoform 5 of Myosin-14	B0I1S2;Q7Z406-2;Q7Z406;C3TTN4;Q7Z406-1;A1L2Z2;B3KWH4;B4E177;Q14780;Q7Z406-4;B3KV65;Q7Z406-5	6	5	2	2	0.8	0.8	232.01	2		1	1									4.78e-70	0.36435	0.81869	111.67	4	504070000	413170000	90900000
Q92572	86	266;692;693;717;1033	65	268	IPI00014624	IPI00014624	5	5	5	Adapter-related protein complex 3 sigma-1 subunit;AP-3 complex subunit sigma-1;AP-3 complex subunit sigma-3A;Clathrin-associated/assembly/adapter protein, small 3;Sigma-3A-adaptin;Sigma-adaptin 3a;cDNA, FLJ92106, highly similar to Homo sapiens adaptor-related protein complex 3, sigma 1 subunit(AP3S1), mRNA	AP3S1;CLAPS3	AP-3 complex subunit sigma-1	Q92572;B2R4I8	1	5	5	5	14.3	14.3	32.144										6	1		3.66e-26	0.3919	0.81919	32.166	7	14008000	7758500	6249800
O14744	143	3;360;1032;1063			IPI00441473;IPI00064328;IPI00794580;IPI00952972	IPI00441473;IPI00064328;IPI00794580	4;4;3;1	4;4;3;1	4;4;3;1	72 kDa ICln-binding protein;Histone-arginine N-methyltransferase PRMT5;Jak-binding protein 1;Protein arginine N-methyltransferase 5;Shk1 kinase-binding protein 1 homolog;cDNA, FLJ96564, highly similar to Homo sapiens SKB1 homolog (S. pombe) (SKB1), mRNA;cDNA FLJ90770 fis, clone THYRO1000866, highly similar to Protein arginine N-methyltransferase 5 (EC 2.1.1.-);Protein arginine methyltransferase 5…	HRMT1L5;IBP72;JBP1;PRMT5;SKB1;hCG_41976	Protein arginine N-methyltransferase 5;protein arginine methyltransferase 5 isoform b;cDNA FLJ54078, highly similar to Protein arginine N-methyltransferase 5	O14744;B2RDD7;B5BU10;A8MZ91;B4DV00;B4DX49;B4DY30	4	4	4	4	10.8	10.8	72.683			4										9.68e-11	0.35119	0.81979	20.886	4	8175900	5764500	2411400
B4DVB8	192	140;736;841			IPI00301936;IPI00940851	IPI00301936;IPI00940851	3;3	3;3	3;3	cDNA FLJ60076, highly similar to ELAV-like protein 1;ELAV-like protein 1;Hu-antigen R	ELAVL1;HUR	cDNA FLJ60076, highly similar to ELAV-like protein 1;ELAV-like protein 1	B4DVB8;Q15717;Q53XN6	2	3	3	3	13	13	38.996									4				7.69e-12	0.39005	0.83497	22.694	4	4225700	1932800	2292900
P63244	252	158;396			IPI00848226;IPI00910724	IPI00848226;IPI00910724	2;1	2;1	2;1	Cell proliferation-inducing gene 21 protein;Guanine nucleotide-binding protein subunit beta-2-like 1;Guanine nucleotide-binding protein subunit beta-like protein 12.3;Human lung cancer oncogene 7 protein;Receptor for activated C kinase;Receptor of activated protein kinase C 1;cDNA FLJ60170, highly similar to Guanine nucleotide-binding protein subunit beta 2-like 1	GNB2L1;HLC7;PIG21	Guanine nucleotide-binding protein subunit beta-2-like 1;cDNA FLJ60170, highly similar to Guanine nucleotide-binding protein subunit beta 2-like 1	P63244;B4DVD2	2	2	2	2	8.8	8.8	35.076									3				1.82e-07	0.37514	0.84506	14.416	3	2447400	1514300	933100
O75533	119	2;46;294;445;484;524;846;889	93;94;95;96;97;98	441;446;453;609;613;620	IPI00026089;IPI00917430	IPI00026089	8;1	8;1	8;1	Pre-mRNA-splicing factor SF3b 155 kDa subunit;Spliceosome-associated protein 155;Splicing factor 3B subunit 1;SF3B1 protein;Putative uncharacterized protein DKFZp434M052	SAP155;SF3B1;DKFZp434M052	Splicing factor 3B subunit 1	O75533;A0JLT9;A0PJH5;Q32Q20;Q7Z497;Q9NTB4	2	8	8	8	9.3	9.3	145.83	7	2											1.69e-14	0.37022	0.84721	28.381	9	23957000	16669000	7287600
O00214-2	69	16;813			IPI00165587;IPI00215644;IPI00874257;IPI00010844;IPI00382683;IPI00645902;IPI00646437;IPI00479062;IPI00514654;IPI00909243;IPI00645350;IPI00644218	IPI00165587;IPI00215644;IPI00874257;IPI00010844;IPI00382683;IPI00645902;IPI00646437;IPI00479062;IPI00514654;IPI00909243;IPI00645350;IPI00644218	2;2;2;2;2;1;1;1;1;1;1;1	2;2;2;2;2;1;1;1;1;1;1;1	2;2;2;2;2;1;1;1;1;1;1;1	Galectin-8;Po66 carbohydrate-binding protein;Prostate carcinoma tumor antigen 1;Lectin, galactoside-binding, soluble, 8;Lymphocyte/NHL galectin-8 long isoform;Colorectal carcinoma-derived galectin-8 variant II;Putative uncharacterized protein LGALS8;Galectin-8 variant;Lymphocyte/NHL galectin-8 short isoform;cDNA FLJ55079, highly similar to Homo sapiens lectin, galactoside-binding, soluble, 8, tra…	LGALS8;RP11-385F5.1-001;RP11-385F5.1-007;RP11-385F5.1-006;RP11-385F5.1-009;RP11-385F5.1-013;RP11-385F5.1-014;RP11-385F5.1-011	galectin-8 isoform a;Isoform 3 of Galectin-8;Putative uncharacterized protein LGALS8;Isoform 1 of Galectin-8;Lymphocyte/NHL galectin-8 short isoform;Lectin, galactoside-binding, soluble, 8;Lectin, galactoside-binding, soluble, 8;Lectin, galactoside-binding	O00214-2;O00214;Q5T3P5;Q8TEV1;Q9BXC8;O00214-3;C9JNF5;O00214-1;Q59E97;Q96QS7;Q5T3P6;Q5T3P9;Q5T3Q0;B1ANM0;B4DJG2;B1ANL9;B3F166;Q5T3P7	12	2	2	2	5.6	5.6	40.397									2				0.0021672	0.42087	0.84733	22.225	2	1471600	965250	506340
Q9UBB9-1	88	137;166;338;371;447;531;678;844;851	66;67	689;711	IPI00015924;IPI00910595;IPI00941082;IPI00220893;IPI00879058;IPI00879557;IPI00879233;IPI00878738;IPI00878423	IPI00015924;IPI00910595;IPI00941082	9;6;6;3;2;2;2;1;1	9;6;6;3;2;2;2;1;1	9;6;6;3;2;2;2;1;1	Septin and tuftelin-interacting protein 1;Tuftelin-interacting protein 11;Tuftelin interacting protein 11;cDNA FLJ58206, highly similar to Tuftelin-interacting protein 11;cDNA FLJ57193, highly similar to Tuftelin-interacting protein 11	HSPC006;STIP;TFIP11	Isoform 1 of Tuftelin-interacting protein 11;cDNA FLJ58206, highly similar to Tuftelin-interacting protein 11;cDNA FLJ57193, highly similar to Tuftelin-interacting protein 11	Q9UBB9-1;Q9UBB9;Q20WL0;Q8N523;B4DPE5;B4DSX8	9	9	9	9	13.1	13.1	96.819		9											2.95e-28	0.36687	0.85269	19.532	9	16215000	11370000	4844200
Q07020	155	413;881			IPI00215719;IPI00908950	IPI00215719;IPI00908950	2;1	2;1	2;1	60S ribosomal protein L18;Ribosomal protein L18	RPL18	60S ribosomal protein L18;Ribosomal protein L18	Q07020;Q0QEW2;B4DDY5	2	2	2	2	13.8	13.8	21.634										2			1.62e-16	0.44548	0.85587	22.67	2	2629000	1047200	1581800
Q9P2I0	226	558;729			IPI00419531;IPI00902580	IPI00419531;IPI00902580	2;2	2;2	2;2	Cleavage and polyadenylation specificity factor 100 kDa subunit;Cleavage and polyadenylation specificity factor subunit 2;cDNA FLJ13521 fis, clone PLACE1005876, highly similar to Cleavage and polyadenylation specificity factor 100 kDa subunit;cDNA FLJ11050 fis, clone PLACE1004564, highly similar to Cleavage and polyadenylation specificity factor 100 kDa subunit	CPSF100;CPSF2;KIAA1367	Cleavage and polyadenylation specificity factor subunit 2;cDNA FLJ11050 fis, clone PLACE1004564, highly similar to Cleavage and polyadenylation specificity factor 100 kDa subunit	Q9P2I0;B3KME1;B3KN45;B3KMI0	2	2	2	2	3.2	3.2	88.486		2											0.43754	0.35888	0.86999	61.506	2	845820	538220	307600
P05387	61	403;688			IPI00008529	IPI00008529	2	2	2	60S acidic ribosomal protein P2;Renal carcinoma antigen NY-REN-44;cDNA, FLJ92222, Homo sapiens ribosomal protein, large P2 (RPLP2), mRNA;Ribosomal protein, large, P2, isoform CRA_a;RPLP2 protein	D11S2243E;RPLP2;RPP2;hCG_1778304	60S acidic ribosomal protein P2	P05387;Q6FG96	1	2	2	2	24.3	24.3	11.665												2	2.51e-08	0.39445	0.8731	19.565	2	3349400	2325100	1024300
P23396	70	19;185;227;260;287;466;583;888			IPI00011253;IPI00939811;IPI00855830	IPI00011253	8;3;2	8;3;2	8;3;2	40S ribosomal protein S3;Ribosomal protein S3 variant	OK/SW-cl.26;RPS3	40S ribosomal protein S3	P23396;Q53G83	3	8	8	8	32.1	32.1	26.688							8		2				3.19e-26	0.40905	0.88064	95.444	10	62494000	7711700	54782000
P49756-1	40	267;490;577			IPI00004273;IPI00925670;IPI00924634;IPI00926163	IPI00004273;IPI00925670	3;3;1;1	3;3;1;1	3;3;1;1	Arg/Glu/Asp-rich protein of 120 kDa;Protein S164;RNA-binding motif protein 25;RNA-binding protein 25;RNA-binding region-containing protein 7;U1 small nuclear ribonucleoprotein 1SNRP homolog protein	RBM25;RNPC7	Isoform 1 of RNA-binding protein 25;Isoform 4 of RNA-binding protein 25	P49756-1;P49756;Q16083;P49756-4	4	3	3	3	4.6	4.6	100.18	2	2	1	1		1							2.88e-07	0.38128	0.88196	17.484	7	8457500	5838500	2619000
P11387	221	18;103;104;192;197;233;307;335;354;368;463;535;605;682;690;712;713;714;771;817;959;960;1062;1067;1077	156;157	555;581	IPI00413611;IPI00465141;IPI00911056	IPI00413611	25;5;4	25;5;4	25;5;4	DNA topoisomerase 1;DNA topoisomerase I;Topoisomerase (DNA) I;TOP1 protein;Putative uncharacterized protein	TOP1	DNA topoisomerase 1	P11387;B9EG90;Q6NWZ5;Q6PK95;Q9BVT2	3	25	25	25	28	28	90.725		31	11						1				3.93e-95	0.37554	0.88474	26.112	43	191640000	125480000	66162000
B4DP32	176	181;306;582			IPI00397701;IPI00221092;IPI00450975	IPI00397701;IPI00221092;IPI00450975	3;3;2	3;3;2	3;3;2	cDNA FLJ56786, moderately similar to 40S ribosomal protein S16;40S ribosomal protein S16;RPS16 protein	RPS16	cDNA FLJ56786, moderately similar to 40S ribosomal protein S16;40S ribosomal protein S16;RPS16 protein	B4DP32;P62249;Q6IPX4	3	3	3	3	21.9	21.9	16.412												4	5.29e-05	0.40088	0.8988	12.563	4	6115500	4197700	1917800
A8MUS3	101	516;517;644;698	89	125	IPI00789159;IPI00793523;IPI00794894;IPI00176755;IPI00021266;IPI00923578;IPI00788093;IPI00397695	IPI00789159;IPI00793523;IPI00794894;IPI00176755;IPI00021266;IPI00923578;IPI00788093;IPI00397695	4;4;4;4;4;2;2;2	4;4;4;4;4;2;2;2	4;4;4;4;4;2;2;2	Putative uncharacterized protein RPL23A;Ribosomal protein L23a, isoform CRA_a;60S ribosomal protein L23a;Putative uncharacterized protein	hCG_1988529;RPL23A	Ribosomal protein L23a, isoform CRA_a;Putative uncharacterized protein RPL23A;Putative uncharacterized protein RPL23A;Putative uncharacterized protein ENSP00000415110;60S ribosomal protein L23a;Putative uncharacterized protein;18 kDa protein;18 kDa protein	A8MUS3;A8MXA8;C9JSM9;C9JGG2;P62750;B9EJE3	8	4	4	4	23.2	23.2	21.916											6	2	5.71e-13	0.42151	0.90065	41.058	8	25524000	17205000	8319300
A8MXP9	89	269;997;1052			IPI00789551;IPI00017297	IPI00789551;IPI00017297	3;3	3;3	3;3	Putative uncharacterized protein MATR3;Matrin-3;cDNA FLJ10526 fis, clone NT2RP2000931, highly similar to Matrin-3;cDNA FLJ55637, highly similar to Matrin-3;cDNA FLJ53172, highly similar to Matrin-3;cDNA, FLJ79319, highly similar to Matrin-3;Putative uncharacterized protein DKFZp686K0542;Putative uncharacterized protein DKFZp686K23100;Clone CDABP0107 mRNA sequence	MATR3;KIAA0723;DKFZp686K0542;DKFZp686K23100	Putative uncharacterized protein MATR3;Matrin-3	A8MXP9;P43243;B3KM87;B4DF66;B4DRS1;B7ZAV5;Q5CZA7;Q68D11;Q9H4N1	2	3	3	3	5	5	99.966		4	3										0.00062383	0.38471	0.90137	33.232	7	8219200	5378300	2840900
Q9Y5B6-1	29	399;541			IPI00001364;IPI00069267;IPI00797180;IPI00219169	IPI00001364;IPI00069267;IPI00797180;IPI00219169	2;2;1;1	2;2;1;1	2;2;1;1	GC-rich sequence DNA-binding factor homolog;cDNA FLJ35972 fis, clone TESTI2013264, highly similar to GC-RICH SEQUENCE DNA-BINDING FACTOR HOMOLOG;cDNA FLJ46670 fis, clone TRACH3008508, highly similar to GC-rich sequence DNA-binding factor homolog;cDNA FLJ90561 fis, clone OVARC1001132, weakly similar to GC-RICH SEQUENCE DNA-BINDING FACTOR (GCF);BM-020;C21orf66 protein	C21orf66;GCFC	Isoform A of GC-rich sequence DNA-binding factor homolog;Isoform B of GC-rich sequence DNA-binding factor homolog;Isoform D of GC-rich sequence DNA-binding factor homolog;Isoform C of GC-rich sequence DNA-binding factor homolog	Q9Y5B6-1;Q9Y5B6;B3KSC0;B3KY25;Q8N2J1;Q9NZD7;Q9Y5B6-2;Q9Y5B6-4;Q9Y5B6-3;Q5XGA1;Q8N6E6	4	2	2	2	2.6	2.6	104.8	2	2	1										0.0012036	0.39304	0.90551	36.211	5	4420100	2640400	1779600
P62906	218	33;105;245;508	154;155	85;144	IPI00412579;IPI00478277;IPI00035167;IPI00413986	IPI00412579;IPI00478277	4;3;1;1	4;3;1;1	4;3;1;1	60S ribosomal protein L10a;CSA-19;Neural precursor cell expressed developmentally down-regulated protein 6;Ribosomal protein L1	NEDD6;RPL10A	60S ribosomal protein L10a;15 kDa protein	P62906;Q1JQ76	4	4	4	4	20.3	20.3	24.831							7						3.93e-09	0.42113	0.90561	10.295	7	8048500	5299600	2749000
O15143	44	731;732;840;958			IPI00005160;IPI00737530;IPI00927418;IPI00925033;IPI00924615;IPI00927612;IPI00927861;IPI00927206	IPI00005160;IPI00737530	4;4;1;1;1;1;1;1	4;4;1;1;1;1;1;1	4;4;1;1;1;1;1;1	Actin-related protein 2/3 complex subunit 1B;Arp2/3 complex 41 kDa subunit;p41-ARC;Actin related protein 2/3 complex, subunit 1B, 41kDa;Actin related protein 2/3 complex, subunit 1B, 41kDa, isoform CRA_a;cDNA, FLJ95695, Homo sapiens actin related protein 2/3 complex, subunit 1B, 41kDa(ARPC1B), mRNA	ARC41;ARPC1B;hCG_19475;tcag7.662	Actin-related protein 2/3 complex subunit 1B;similar to actin related protein 2/3 complex subunit 1B	O15143;A4D275	8	4	4	4	14.5	14.5	40.949	1							4					1.19e-09	0.51757	0.90671	25.978	4	14212000	9398300	4813700
P40429	195	24;25;1079			IPI00304612;IPI00398983;IPI00936705;IPI00909017;IPI00398949	IPI00304612;IPI00398983;IPI00936705;IPI00909017;IPI00398949	3;3;3;3;2	3;3;3;3;2	3;3;3;3;2	23 kDa highly basic protein;60S ribosomal protein L13a;RPL13A protein;Ribosomal protein L13a variant;FWP004;Ribosomal protein L13a;Ribosomal protein L13a, isoform CRA_b;Novel protein similar to ribosomal protein L13a RPL13A;cDNA FLJ51256, highly similar to 60S ribosomal protein L13a	RPL13A;hCG_1998057;RPL13a;RP11-365K22.1-001	60S ribosomal protein L13a;Novel protein similar to ribosomal protein L13a RPL13A;similar to ribosomal protein L13a;cDNA FLJ51256, highly similar to 60S ribosomal protein L13a;23 kDa protein	P40429;Q0VGL3;Q53H34;Q5QTS3;Q8J015;Q9BSQ6;Q5VY36;B4DNC8	5	3	3	3	11.3	11.3	23.577										3			0.01517	0.35317	0.90987	8.2005	3	2885700	1925800	959900
P61158	127	21;135;151;172;238;314;571;695	101;102	93;327	IPI00028091;IPI00908396;IPI00007068;IPI00554433;IPI00892652;IPI00642069;IPI00888282;IPI00946655	IPI00028091	8;2;1;1;1;1;1;1	8;2;1;1;1;1;1;1	8;2;1;1;1;1;1;1	Actin-like protein 3;Actin-related protein 3;cDNA FLJ51082, highly similar to Actin-like protein 3;cDNA FLJ52521, highly similar to Actin-like protein 3;cDNA FLJ51148, highly similar to Actin-like protein 3;cDNA FLJ52434, highly similar to Actin-like protein 3;cDNA, FLJ79112, highly similar to Actin-like protein 3;cDNA, FLJ79295, highly similar to Actin-like protein 3;ARP3 actin-related protein 3…	ACTR3;ARP3;hCG_26669	Actin-related protein 3	P61158;B4DT29;B4DTI0;B4DXW1;Q53QM2;Q59FV6	8	8	8	8	28	28	47.371					7	8							5.1e-55	0.46412	0.92331	24.026	15	40182000	22608000	17574000
P61160	43	144;316;331;409;515;853;990	36;37;38;39;40	56;67;74;114;309	IPI00005159;IPI00470573;IPI00909247;IPI00176593	IPI00005159;IPI00470573;IPI00909247	7;6;5;3	7;6;5;3	7;6;5;3	Actin-like protein 2;Actin-related protein 2;ACTR2 protein;cDNA FLJ51656, highly similar to Actin-like protein 2;cDNA FLJ51655, highly similar to Actin-like protein 2	ACTR2;ARP2	Actin-related protein 2;actin-related protein 2 isoform a;cDNA FLJ51655, highly similar to Actin-like protein 2	P61160;Q8IY98;B4DHK9;B4DWQ5	4	7	7	7	24.1	24.1	44.76						8							2.24e-34	0.47704	0.92451	15.734	8	27949000	17343000	10606000
P05388	62	304;313;942			IPI00008530;IPI00871646;IPI00791448;IPI00556485;IPI00794884;IPI00868999;IPI00793002;IPI00791188;IPI00797741;IPI00790287	IPI00008530;IPI00871646;IPI00791448;IPI00556485;IPI00794884;IPI00868999;IPI00793002;IPI00791188	3;3;3;2;2;2;2;2;1;1	3;3;3;2;2;2;2;2;1;1	3;3;3;2;2;2;2;2;1;1	60S acidic ribosomal protein P0;60S ribosomal protein L10E;cDNA FLJ75549, highly similar to Homo sapiens ribosomal protein, large, P0 (RPLP0), transcript variant 1, mRNA;Ribosomal protein P0 variant;60S acidic ribosomal protein P0-like;cDNA FLJ51469, highly similar to 60S acidic ribosomal protein P0;RPLP0 protein	RPLP0	60S acidic ribosomal protein P0;60S acidic ribosomal protein P0-like;cDNA FLJ51469, highly similar to 60S acidic ribosomal protein P0;RPLP0 protein;24 kDa protein;60S acidic ribosomal protein P0;19 kDa protein;18 kDa protein	P05388;A8K4Z4;Q53HK9;Q53HW2;Q8NHW5;B4E3D5;Q3MHV2;Q3B7A4;Q6NSF2	10	3	3	3	10.7	10.7	34.273								3					3.35e-14	0.4952	0.92676	14.407	3	3651800	1926700	1725100
Q15393-1	190	23;231;329;446;449;467;545;608;632;640;872;877;938;955	136	1093	IPI00300371;IPI00828110;IPI00179138	IPI00300371;IPI00828110	14;7;3	14;7;3	14;7;3	Pre-mRNA-splicing factor SF3b 130 kDa subunit;Spliceosome-associated protein 130;Splicing factor 3B subunit 3;STAF130;cDNA FLJ78677, highly similar to Homo sapiens splicing factor 3b, subunit 3, 130kDa (SF3B3), mRNA;cDNA FLJ10435 fis, clone NT2RP1000493, highly similar to Splicing factor 3B subunit 3;cDNA FLJ90452 fis, clone NT2RP3001475, highly similar to Splicing factor 3B subunit 3	KIAA0017;SAP130;SF3B3	Isoform 1 of Splicing factor 3B subunit 3;Isoform 3 of Splicing factor 3B subunit 3	Q15393-1;Q15393;A8K6V3;B3KM77;B3KQH1;Q15393-3	3	14	14	14	16.4	16.4	135.58	10	10	1					1					1.28e-66	0.4226	0.92723	31.801	22	61217000	35972000	25245000
P38646	58	79;85;86;121;201;204;649;679;747;950;1002;1038;1039	53;54;55;56;57	172;303;370;389;561	IPI00007765;IPI00922694	IPI00007765;IPI00922694	13;9	13;9	13;9	75 kDa glucose-regulated protein;Heat shock 70 kDa protein 9;Mortalin;Peptide-binding protein 74;Stress-70 protein, mitochondrial;cDNA FLJ51811, highly similar to Stress-70 protein, mitochondrial;cDNA FLJ51907, highly similar to Stress-70 protein, mitochondrial;Heat shock 70 kDa protein 9B;HSPA9 protein;Catecholamine-regulated protein 40;cDNA FLJ51903, highly similar to Stress-70 protein, mitocho…	GRP75;HSPA9;HSPA9B	Stress-70 protein, mitochondrial;cDNA FLJ51903, highly similar to Stress-70 protein, mitochondrial	P38646;B7Z1V7;B7Z4V2;Q2F839;Q8N1C8;A1XP52;B7Z4T3	2	13	13	13	25.5	25.5	73.68			17										7.27e-57	0.40156	0.94001	15.645	17	36854000	23035000	13819000
B2R4K7	200	49;341			IPI00790342;IPI00329389;IPI00867533	IPI00790342;IPI00329389;IPI00867533	2;2;2	2;2;2	2;2;2	60S ribosomal protein L6;Neoplasm-related protein C140;Tax-responsive enhancer element-binding protein 107	RPL6;TXREB1	60S ribosomal protein L6;60S ribosomal protein L6;60S ribosomal protein L6	B2R4K7;Q9HBB3;Q02878;B4DRX3;Q8N5Z7;Q8TBK5	3	2	2	2	10.4	10.4	32.872									2				0.086419	0.44961	0.94072	1.724	2	3521900	1069200	2452700
O00159-1	66	373;595;723;943;1083			IPI00743335;IPI00829992;IPI00010418;IPI00791026	IPI00743335;IPI00829992;IPI00010418;IPI00791026	5;5;5;3	5;5;5;3	5;5;5;3	Myosin I beta;Myosin-Ic;cDNA FLJ53573, highly similar to Myosin Ic;MYO1C protein;cDNA FLJ52405, highly similar to Myosin Ic	MYO1C	Isoform 1 of Myosin-Ic;Isoform 3 of Myosin-Ic;Isoform 2 of Myosin-Ic;56 kDa protein	O00159-1;O00159;O00159-3;B7Z3E5;O00159-2;A1L180;B7Z9C0	4	5	5	5	4.2	4.2	121.72		5											0.00213	0.3639	0.94577	17.868	5	5347200	3708400	1638800
B7Z4C8	122	650;681			IPI00917298;IPI00848331;IPI00026302;IPI00856058;IPI00916315;IPI00915795;IPI00916572	IPI00917298;IPI00848331;IPI00026302;IPI00856058;IPI00916315;IPI00915795;IPI00916572	2;2;2;2;2;2;2	2;2;2;2;2;2;2	2;2;2;2;2;2;2	cDNA FLJ57527, highly similar to 60S ribosomal protein L31;Putative uncharacterized protein RPL31;cDNA FLJ58912, highly similar to 60S ribosomal protein L31;Ribosomal protein L31, isoform CRA_c;60S ribosomal protein L31;cDNA, FLJ92036, highly similar to Homo sapiens ribosomal protein L31 (RPL31), mRNA;Ribosomal protein L31;RPL31 protein;cDNA FLJ58908, highly similar to 60S ribosomal protein L31	RPL31;hCG_27618	Putative uncharacterized protein RPL31;ribosomal protein L31 isoform 2;60S ribosomal protein L31;ribosomal protein L31 isoform 3;Putative uncharacterized protein RPL31;Putative uncharacterized protein RPL31;Putative uncharacterized protein RPL31	B7Z4C8;B7Z4K2;P62899;B2R4C1;Q76N53;Q6IRZ0;B7Z4E3;C9JU56;C9JQ13	7	2	2	2	17.7	17.7	15.118												2	6.66e-22	0.42264	0.94664	14.169	2	4131800	2826300	1305600
Q00059	99	26;200;715			IPI00020928;IPI00644515;IPI00643708	IPI00020928;IPI00644515;IPI00643708	3;3;2	3;3;2	3;3;2	Mitochondrial transcription factor 1;Transcription factor 6;Transcription factor 6-like 2;Transcription factor A, mitochondrial;TFAM protein;Putative uncharacterized protein TFAM	TCF6;TCF6L2;TFAM	Transcription factor A, mitochondrial;Putative uncharacterized protein TFAM;Putative uncharacterized protein TFAM	Q00059;A9QXC6;Q6LES8;A8MRB2;Q05D31;Q3SX57;C9JGW4	3	3	3	3	13.8	13.8	29.096										3			0.00010159	0.50199	0.9472	41.04	3	2196600	1369300	827330
P61353	170	704;1053;1059;1095			IPI00219155;IPI00790294;IPI00792879	IPI00219155;IPI00790294	4;3;1	4;3;1	4;3;1	60S ribosomal protein L27	RPL27	60S ribosomal protein L27;60S ribosomal protein L27	P61353;B2R4D8;Q6LCU2	3	4	4	4	25.7	25.7	15.798												5	0.00082212	0.41245	0.95192	16.151	5	4608000	3180700	1427300
A8MYY8	46	562;744	43;44	9;19	IPI00871870;IPI00005162;IPI00911088;IPI00796102;IPI00797967	IPI00871870;IPI00005162;IPI00911088;IPI00796102;IPI00797967	2;2;2;2;2	2;2;2;2;2	2;2;2;2;2	Actin-related protein 2/3 complex subunit 3;Arp2/3 complex 21 kDa subunit;cDNA, FLJ92050, highly similar to Homo sapiens actin related protein 2/3 complex, subunit 3, 21kDa (ARPC3), mRNA;Actin related protein 2/3 complex;cDNA FLJ51245, highly similar to Actin-related protein 2/3 complex subunit 3;Putative uncharacterized protein ARPC3	ARC21;ARPC3	Putative uncharacterized protein ARPC3 (Fragment);Actin-related protein 2/3 complex subunit 3;cDNA FLJ51245, highly similar to Actin-related protein 2/3 complex subunit 3;Putative uncharacterized protein ARPC3;6 kDa protein	A8MYY8;O15145;B2R4D5;Q2LE71;B4DM63;C9JZD1	5	2	2	2	13.5	13.5	20.528												3	4.15e-05	0.42805	0.95972	26.972	3	9246600	6284800	2961800
P17987	181	557;1092			IPI00290566;IPI00550591	IPI00290566;IPI00550591	2;2	2;2	2;2	CCT-alpha;T-complex protein 1 subunit alpha	CCT1;CCTA;TCP1	T-complex protein 1 subunit alpha;T-complex protein 1 isoform b	P17987	2	2	2	2	4.9	4.9	60.343				2									0.03745	0.3786	0.96141	21.372	2	1214400	782560	431870
B7Z6Z4	204	67;170;697;1014	143	166	IPI00796366;IPI00335168;IPI00789605;IPI00930599;IPI00795576;IPI00793089;IPI00413922;IPI00797626;IPI00796500;IPI00795944;IPI00909366;IPI00027255;IPI00101961;IPI00792530	IPI00796366;IPI00335168;IPI00789605;IPI00930599;IPI00795576;IPI00793089;IPI00413922;IPI00797626;IPI00796500;IPI00795944	4;4;4;4;3;3;3;2;2;2;1;1;1;1	4;4;4;4;3;3;3;2;2;2;1;1;1;1	4;4;4;4;3;3;3;2;2;2;1;1;1;1	cDNA FLJ56329, highly similar to Myosin light polypeptide 6;17 kDa myosin light chain;Myosin light chain 3;Myosin light chain alkali 3;Myosin light polypeptide 6;Smooth muscle and nonmuscle myosin light chain alkali 6;MYL6 protein	MYL6	cDNA FLJ56329, highly similar to Myosin light polypeptide 6;Isoform Non-muscle of Myosin light polypeptide 6;Isoform Smooth muscle of Myosin light polypeptide 6;16 kDa protein;13 kDa protein;13 kDa protein;11 kDa protein;11 kDa protein;10 kDa protein;8 kDa	B7Z6Z4;P60660-1;P60660;P60660-2;Q6IBG5	14	4	4	4	21.8	21.8	26.707							1				2	8	2.9e-23	0.44313	0.96722	13.399	11	71958000	45304000	26653000
P62851	77	4;138;139;569;604;1040			IPI00012750;IPI00903251;IPI00877856	IPI00012750;IPI00903251	6;6;2	6;6;2	6;6;2	40S ribosomal protein S25	RPS25	40S ribosomal protein S25;14 kDa protein	P62851	3	6	6	6	29.6	29.6	13.742										1	2	8	9.55e-38	0.4274	0.97191	23.672	11	157550000	104170000	53378000
O43143	215	76;98;167;168;171;208;215;256;392;414;429;551;612;855;856;894;906;920;1075;1088	146;147;148;149;150;151;152	68;240;273;494;528;537;699	IPI00396435;IPI00031508;IPI00552073;IPI00297178;IPI00789517;IPI00894081	IPI00396435	20;1;1;1;1;1	20;1;1;1;1;1	20;1;1;1;1;1	ATP-dependent RNA helicase #46;DEAH box protein 15;Putative pre-mRNA-splicing factor ATP-dependent RNA helicase DHX15;cDNA FLJ55635, highly similar to pre-mRNA-splicing factorATP-dependent RNA helicase DHX15 (EC 3.6.1.-)	DBP1;DDX15;DHX15	Putative pre-mRNA-splicing factor ATP-dependent RNA helicase DHX15	O43143;B4E0S6	6	20	20	20	29.9	29.9	90.932		27	3	3									1.46e-74	0.4059	0.97214	20.358	33	68434000	43523000	24911000
P61978-2	158	141;311;412;584;710;886			IPI00216746;IPI00216049;IPI00807545;IPI00910458;IPI00514561;IPI00640296;IPI00796697	IPI00216746;IPI00216049;IPI00807545;IPI00910458;IPI00514561;IPI00640296	6;6;6;6;6;3;2	6;6;6;6;6;3;2	6;6;6;6;6;3;2	Heterogeneous nuclear ribonucleoprotein K;Transformation up-regulated nuclear protein;cDNA FLJ53312, highly similar to Heterogeneous nuclear ribonucleoprotein K;Heterogeneous nuclear ribonucleoprotein K transcript variant;cDNA FLJ77137, highly similar to Homo sapiens heterogeneous nuclear ribonucleoprotein K (HNRPK), transcript variant 1, mRNA;Heterogeneous nuclear ribonucleoprotein K isoform a;H…	HNRNPK;HNRPK;hCG_1985922;RP11-575L7.1-003;RP11-575L7.1-005;RP11-575L7.1-001;RP11-575L7.1-006	Isoform 2 of Heterogeneous nuclear ribonucleoprotein K;Isoform 1 of Heterogeneous nuclear ribonucleoprotein K;Isoform 3 of Heterogeneous nuclear ribonucleoprotein K;cDNA FLJ54552, highly similar to Heterogeneous nuclear ribonucleoprotein K;Heterogeneous nu	P61978-2;P61978;B4DFF1;Q5EC54;Q6IBN1;P61978-1;P61978-3;B4DUQ1;Q5T6W2;B3KU16;Q5T6W5;Q5T6W1	7	6	6	6	19	19	51.028				6									1.72e-32	0.40448	0.97245	41.686	6	10276000	7152000	3123800
P62269	78	350;422;473;847;1094			IPI00013296;IPI00397609;IPI00790711;IPI00894147	IPI00013296;IPI00397609;IPI00790711;IPI00894147	5;4;4;3	5;4;4;3	5;4;4;3	40S ribosomal protein S18;Ke-3;Ribosomal protein S18;Ribosomal protein S18, isoform CRA_b;Rhabdomyosarcoma antigen MU-RMS-40.21	D6S218E;RPS18;DADB-159G18.1-001;DAMC-227D19.3-001;DAQB-314F24.10-001;hCG_1640167;XXbac-BCX165D10.12-001;XXbac-BPG185D15.7-001;DASS-63A3.5-001	40S ribosomal protein S18;18 kDa protein;17 kDa protein;Ribosomal protein S18	P62269;Q5SUJ3;C9JGK0;Q5GGW2	4	5	5	5	28.3	28.3	17.718												7	6.31e-14	0.42859	0.97795	11.32	7	24285000	16579000	7706100
P62424	188	41;574			IPI00299573;IPI00397676;IPI00478896;IPI00642454	IPI00299573;IPI00397676;IPI00478896;IPI00642454	2;2;2;1	2;2;2;1	2;2;2;1	60S ribosomal protein L7a;PLA-X polypeptide;Surfeit locus protein 3;cDNA FLJ78489, highly similar to Homo sapiens ribosomal protein L7a (RPL7A), mRNA;cDNA, FLJ92002, Homo sapiens ribosomal protein L7a (RPL7A), mRNA;Ribosomal protein L7a;Ribosomal protein L7a, isoform CRA_c	RPL7A;SURF3;SURF-3;hCG_2032998;RP11-244N20.10-009;RP11-244N20.10-004;RP11-244N20.10-005;RP-L7a	60S ribosomal protein L7a;30 kDa protein;Ribosomal protein L7a;Ribosomal protein L7a	P62424;Q5T8U4;Q5T8U3;Q5T8U2;Q9BY74	4	2	2	2	11.3	11.3	29.995							1		2				0.058894	0.43474	0.97929	21.542	3	1785000	903410	881540
P62861	96	262;263;790			IPI00019770	IPI00019770	3	3	3	40S ribosomal protein S30	FAU	ubiquitin-like protein fubi and ribosomal protein S30 precursor	P62861	1	3	3	3	9	9	14.39												5	0.0010845	0.44935	0.98193	25.788	5	11108000	7598700	3509800
P46781	174	537;538;561;783			IPI00221088;IPI00954541;IPI00925580;IPI00879238;IPI00847192;IPI00478327;IPI00853062;IPI00879512	IPI00221088;IPI00954541;IPI00925580;IPI00879238;IPI00847192	4;3;3;3;3;1;1;1	4;3;3;3;3;1;1;1	4;3;3;3;3;1;1;1	40S ribosomal protein S9;Ribosomal protein S9;Ribosomal protein S9, isoform CRA_a;cDNA FLJ61636, highly similar to 40S ribosomal protein S9;Putative uncharacterized protein RPS9;Ribosomal protein S9, isoform CRA_e;Ribosomal protein S9, isoform CRA_c;RPS9 protein	RPS9;hCG_2009111;XXbac-BCX105G6.6-001;XXbac-BPG111L9.6-001	40S ribosomal protein S9;cDNA FLJ61636, highly similar to 40S ribosomal protein S9;Ribosomal protein S9, isoform CRA_e;Ribosomal protein S9, isoform CRA_c;RPS9 protein (Fragment)	P46781;A9C4C1;B7Z732;C9JM19;B5MCT8;A5D904	8	4	4	4	14.9	14.9	22.591										4			5e-05	0.40817	0.98529	29.8	4	6201700	3074700	3127000
P62277	175	296;469;564;634			IPI00221089	IPI00221089	4	4	4	40S ribosomal protein S13	RPS13	40S ribosomal protein S13	P62277	1	4	4	4	27.8	27.8	17.222												6	1.22e-12	0.42892	0.98577	9.724	6	9849500	6811000	3038500
P08670	224	196;205;213;214;217;336;407;408;434;503;504;546;611;651;652;711;849;935;961;976	158;159;160	183;347;391	IPI00418471;IPI00552689;IPI00793184;IPI00465084;IPI00013164;IPI00217507;IPI00853115;IPI00908745;IPI00868727;IPI00001453;IPI00910602;IPI00923396;IPI00237671;IPI00853283;IPI00953284	IPI00418471	20;4;3;3;3;2;2;2;2;2;1;1;1;1;1	20;4;3;3;3;2;2;2;2;2;1;1;1;1;1	20;4;3;3;3;2;2;2;2;2;1;1;1;1;1	Vimentin;Vimentin variant 3;Vimentin variant 4;cDNA FLJ34494 fis, clone HLUNG2005030, highly similar to VIMENTIN;Vimentin variant	VIM	Vimentin	P08670;B0YJC4;B0YJC5;B3KRK8;Q53HU8	15	20	20	20	47	47	53.651				28	3	1							5.51e-106	0.37431	0.98835	23.063	32	80126000	56143000	23984000
Q13435	178	7;258;370;510;867;1073			IPI00221106;IPI00477803	IPI00221106;IPI00477803	6;5	6;5	6;5	Pre-mRNA-splicing factor SF3b 145 kDa subunit;SF3b150;Spliceosome-associated protein 145;Splicing factor 3B subunit 2;Putative uncharacterized protein DKFZp781L0540	SAP145;SF3B2;DKFZp781L0540	splicing factor 3B subunit 2;Putative uncharacterized protein DKFZp781L0540 (Fragment)	Q13435;A8K485;B4DT19;Q7L4T5;Q7Z627;Q9BWD2;Q7Z3K9;Q96CM6	2	6	6	6	8.6	8.6	100.23	1	3	5	4				1					4.17e-05	0.42208	0.98974	39.477	14	9989000	6134500	3854500
P62081	79	47;90;91;160;448;457;485;630;930;931;993	62	32	IPI00013415;IPI00478287;IPI00796554;IPI00798077;IPI00893703;IPI00942012	IPI00013415;IPI00478287;IPI00796554;IPI00798077	11;8;8;7;5;3	11;8;8;7;5;3	11;8;8;7;5;3	40S ribosomal protein S7;cDNA, FLJ92055, Homo sapiens ribosomal protein S7 (RPS7), mRNA;Putative uncharacterized protein RPS7;Ribosomal protein S7, isoform CRA_b	RPS7;hCG_1784266	40S ribosomal protein S7;22 kDa protein;18 kDa protein;19 kDa protein	P62081;Q57Z92	6	11	11	11	54.1	54.1	22.127										16	1		1.05e-54	0.40841	0.992	30.775	16	53117000	34484000	18633000
P08579	131	308;323;641;655;656	103;104	1;14	IPI00029267;IPI00012382	IPI00029267	5;1	5;1	5;1	U2 small nuclear ribonucleoprotein B;Small nuclear ribonucleoprotein polypeptide B;Similar to small nuclear ribonucleoprotein polypeptide B	SNRPB2	U2 small nuclear ribonucleoprotein B	P08579;B5BTZ8;Q86YK2	2	5	5	5	22.2	22.2	25.486							6		1				2.22e-21	0.47398	1	30.074	7	6532200	4220100	2312100
B1AK88	167	482;749;834;860;870	130	151	IPI00218782;IPI00642256;IPI00026185;IPI00646047;IPI00647677;IPI00903103	IPI00218782;IPI00642256;IPI00026185	5;5;3;2;2;2	5;5;3;2;2;2	5;5;3;2;2;2	Capping protein (Actin filament) muscle Z-line, beta;Capping protein (Actin filament) muscle Z-line, beta, isoform CRA_d;cDNA, FLJ93598, highly similar to Homo sapiens capping protein (actin filament) muscle Z-line, beta (CAPZB), mRNA;cDNA FLJ60094, highly similar to F-actin capping protein subunit beta;CapZ beta;F-actin-capping protein subunit beta;Capping protein (Actin filament) muscle Z-line,…	CAPZB;hCG_41078;RP4-657E11.7-008;RP4-657E11.7-001	cDNA FLJ60094, highly similar to F-actin capping protein subunit beta;Isoform 2 of F-actin-capping protein subunit beta;Isoform 1 of F-actin-capping protein subunit beta	B1AK88;B2R7T8;B4DWA6;P47756-2;P47756;B1AK87;Q32Q68;Q7L4N0;P47756-1	6	5	5	5	17.9	17.9	37.482							1		5	1			2.23e-12	0.48952	1	36.839	7	12254000	9368700	2885700
P83731	199	52;84	138	91	IPI00306332;IPI00793696;IPI00946221;IPI00791426;IPI00795548	IPI00306332;IPI00793696;IPI00946221;IPI00791426;IPI00795548	2;1;1;1;1	2;1;1;1;1	2;1;1;1;1	60S ribosomal protein L24;60S ribosomal protein L30;Putative uncharacterized protein RPL24;Ribosomal protein L24, isoform CRA_e	RPL24;hCG_2023003	60S ribosomal protein L24;19 kDa protein;Ribosomal protein L24, isoform CRA_e;Putative uncharacterized protein RPL24;7 kDa protein	P83731;C9JNW5;C9JXB8	5	2	2	2	14.6	14.6	17.779				1								1	4.17e-12	0.46134	1.0081	NaN	1	2423900	1591200	832730
Q9NVC6-1	191	418;838	137	593	IPI00301139;IPI00909893	IPI00301139;IPI00909893	2;2	2;2	2;2	Activator-recruited cofactor 77 kDa component;Cofactor required for Sp1 transcriptional activation subunit 6;Mediator complex subunit 17;Mediator of RNA polymerase II transcription subunit 17;Thyroid hormone receptor-associated protein complex 80 kDa component;Transcriptional coactivator CRSP77;Vitamin D3 receptor-interacting protein complex 80 kDa component;cDNA FLJ55364, highly similar to CRSP …	ARC77;CRSP6;DRIP77;DRIP80;MED17;TRAP80	Isoform 1 of Mediator of RNA polymerase II transcription subunit 17;cDNA FLJ55364, highly similar to CRSP complex subunit 6	Q9NVC6-1;Q9NVC6;B4DSE1	2	2	2	2	2.8	2.8	72.875			2										0.031582	0.43249	1.0096	5.6462	2	1175100	731870	443210
P19338	232	50;62			IPI00604620;IPI00444262;IPI00183526;IPI00916188	IPI00604620;IPI00444262;IPI00183526;IPI00916188	2;2;1;1	2;2;1;1	2;2;1;1	Nucleolin;Protein C23;cDNA FLJ10452 fis, clone NT2RP1000966, highly similar to NUCLEOLIN;Nucleolin, isoform CRA_c;cDNA FLJ38578 fis, clone HCHON2007674, highly similar to NUCLEOLIN;cDNA FLJ45706 fis, clone FEBRA2028457, highly similar to Nucleolin;Putative uncharacterized protein NCL;NCL protein	NCL;hCG_33980	Nucleolin;cDNA FLJ45706 fis, clone FEBRA2028457, highly similar to Nucleolin;NCL protein;Putative uncharacterized protein NCL	P19338;B3KM80;B3KTP9;Q6ZS99;C9JWL1;Q9BQ02;C9JFE9	4	2	2	2	2.5	2.5	76.613			1	2									0.83904	0.38592	1.0147	7.6322	2	1440300	466460	973870
B4DQN9	244	48;75;243;291;417;437;523;559;653;670;1085	48;49;50;51;52;173;174	55;146;239;249;303;305;345	IPI00645452;IPI00909140;IPI00647896;IPI00908770;IPI00013475;IPI00031370;IPI00930715;IPI00152453;IPI00013683;IPI00953417	IPI00645452;IPI00909140;IPI00647896;IPI00908770;IPI00013475;IPI00031370;IPI00930715	11;10;9;8;6;6;6;5;5;4	11;10;9;8;6;6;6;5;5;4	4;4;2;3;1;1;1;1;1;3	cDNA FLJ50617, highly similar to Tubulin beta-7 chain;cDNA, FLJ79164, highly similar to Tubulin beta-7 chain;cDNA, FLJ79215, highly similar to Tubulin beta-7 chain;Tubulin beta polypeptide;Tubulin, beta;Tubulin beta chain;Tubulin beta-5 chain;cDNA FLJ56903, highly similar to Tubulin beta-7 chain;Beta 5-tubulin;Beta-tubulin protein;Tubulin, beta, isoform CRA_a;MRNA encoding beta-tubulin. (from clo…	DAAP-285E11.4-003;DADB-118P11.3-003;DAMA-26D6.3-003;DAMC-316D20.4-003;DAQB-47P19.9-003;DASS-191K16.2-003;TUBB;XXbac-BCX111D4.2-003;XXbac-BPG252P9.4-003;OK/SW-cl.56;TUBB5;DAAP-285E11.4-001;DADB-118P11.3-001;DAMA-26D6.3-001;DAMC-316D20.4-001;DAQB-47P19.9-001;DASS-191K16.2-001;hCG_26016;XXbac-BCX111D4.2-001;XXbac-BPG252P9.4-001;XTP3TPATP1;DAAP-285E11.4-002;DADB-118P11.3-002;DAMA-26D6.3-002;DAMC-316D…	Tubulin, beta;cDNA FLJ56903, highly similar to Tubulin beta-7 chain;Tubulin, beta;cDNA FLJ53063, highly similar to Tubulin beta-7 chain;Tubulin beta-2A chain;Tubulin beta-2B chain;cDNA, FLJ93005, highly similar to Homo sapiens tubulin, beta polypeptide (TU	B4DQN9;B7ZAF0;B7ZAK1;Q5JP53;P07437;B4DY90;Q5SU16;Q6LC01;B4DXZ5;Q1KSF8;Q5ST81;Q6P602;Q96B85;Q9BUU9;B4DMU8;Q13885;A5D906;A5D907;Q9BVA1;A1L195;A8K068;B4E052;B7Z4N1;O43209;Q9UGA2;B2R6L0	10	11	11	4	35.2	14.1	47.766					16								1.46e-37	0.53964	1.0159	30.378	16	45627000	25297000	20330000
B4DT11	128	252;635			IPI00944951;IPI00924712;IPI00028579;IPI00376953;IPI00376952;IPI00946556;IPI00926118;IPI00926538;IPI00925005;IPI00926390	IPI00944951;IPI00924712;IPI00028579;IPI00376953;IPI00376952;IPI00946556;IPI00926118;IPI00926538;IPI00925005;IPI00926390	2;2;2;2;2;1;1;1;1;1	2;2;2;2;2;1;1;1;1;1	2;2;2;2;2;1;1;1;1;1	cDNA FLJ55523, highly similar to Transcription initiation factor TFIID subunit 6;RNA polymerase II TBP-associated factor subunit E;Transcription initiation factor TFIID 70 kDa subunit;Transcription initiation factor TFIID 80 kDa subunit;Transcription initiation factor TFIID subunit 6;TAF6 RNA polymerase II, TATA box binding protein (TBP)-associated factor, 80kDa;cDNA FLJ40462 fis, clone TESTI2042…	TAF2E;TAF6;TAFII70;tcag7.663	79 kDa protein;cDNA FLJ55523, highly similar to Transcription initiation factor TFIID subunit 6;Isoform 1 of Transcription initiation factor TFIID subunit 6;TBP-associated factor 6 isoform delta;Isoform 2 of Transcription initiation factor TFIID subunit 6;	B4DT11;P49848-1;P49848;A4D299;P49848-2;B3KUR4;C9J7C4;C9JIS2;C9JTY6;C9JFL8;C9J088;C9JW87;C9JHQ8	10	2	2	2	2.9	2.9	78.948			2										0.12566	0.43839	1.0233	2.4779	2	1580100	876960	703140
P55084	108	5;212;989			IPI00022793;IPI00893108;IPI00893995;IPI00893587	IPI00022793;IPI00893108;IPI00893995;IPI00893587	3;3;2;2	3;3;2;2	3;3;2;2	3-ketoacyl-CoA thiolase;Acetyl-CoA acyltransferase;Beta-ketothiolase;TP-beta;Trifunctional enzyme subunit beta, mitochondrial;cDNA FLJ59448, highly similar to Trifunctional enzyme subunit beta, mitochondrial;cDNA FLJ55769, highly similar to Trifunctional enzyme subunit beta, mitochondrial;cDNA FLJ56214, highly similar to Trifunctional enzyme subunit beta, mitochondrial;Putative uncharacterized pr…	HADHB;MSTP029	Trifunctional enzyme subunit beta, mitochondrial;Putative uncharacterized protein HADHB;Putative uncharacterized protein HADHB;Putative uncharacterized protein HADHB	P55084;B4DDC9;B4DY96;B4E2W0;B5MD38;C9JE81;C9JEY0	4	3	3	3	7	7	51.294						4							0.0010607	0.52845	1.0241	9.1051	4	9478400	6937600	2540800
Q5HY50	240	239;992	167;168	152;200	IPI00940950;IPI00554723;IPI00853161;IPI00646899;IPI00064765;IPI00398057;IPI00893680;IPI00894025	IPI00940950;IPI00554723;IPI00853161;IPI00646899;IPI00064765;IPI00398057;IPI00893680;IPI00894025	2;2;2;2;1;1;1;1	2;2;2;2;1;1;1;1	2;2;2;2;1;1;1;1	Ribosomal protein L10;60S ribosomal protein L10;Laminin receptor homolog;Protein QM;Tumor suppressor QM;Putative uncharacterized protein RPL10;60S ribosomal protein L10-like	RPL10;XX-FW83563B9.1-011;DXS648E;QM;RPL10L	Ribosomal protein L10 (Fragment);60S ribosomal protein L10;60S ribosomal protein L10;Putative uncharacterized protein RPL10;60S ribosomal protein L10-like;24 kDa protein;Putative uncharacterized protein RPL10;Putative uncharacterized protein RPL10	Q5HY50;P27635;C9J7T6;Q96L21;C9J6J7;C9J7G5	8	2	2	2	10.9	10.9	26.593										3			0.0724	0.42514	1.0263	57.638	3	1541700	991640	550080
P09661	185	295;480;677;845;1009			IPI00297477;IPI00792607;IPI00797067;IPI00782963	IPI00297477;IPI00792607;IPI00797067	5;3;3;1	5;3;3;1	5;3;3;1	U2 small nuclear ribonucleoprotein A;Small nuclear ribonucleoprotein polypeptide A variant;cDNA FLJ75425, highly similar to Homo sapiens small nuclear ribonucleoprotein polypeptide A, mRNA;Small nuclear ribonucleoprotein polypeptide A, isoform CRA_d;SNRPA1 protein;U2 snRNP-specific A protein	SNRPA1;hCG_1992004	U2 small nuclear ribonucleoprotein A;Small nuclear ribonucleoprotein polypeptide A, isoform CRA_d;U2 snRNP-specific A protein	P09661;Q53G21;Q53G61;Q6NVW9;O95485;Q9UEN1	4	5	5	5	24.3	24.3	28.415							1		5				2.96e-19	0.47939	1.0273	10.592	5	4955500	3166400	1789000
Q5VU58	209	31;32;51;68;423;424;425;426;475;486;487;519;520;637;657;795;796;908	128;144	105;245	IPI00382894;IPI00183968;IPI00645055;IPI00014581;IPI00296039;IPI00915324;IPI00647245;IPI00442894;IPI00794188	IPI00382894;IPI00183968;IPI00645055	18;13;9;7;7;7;7;5;1	18;13;9;7;7;7;7;5;1	2;2;2;1;1;1;2;1;1	Tropomyosin 3;Tropomyosin 3, isoform CRA_b;TPMsk3;Gamma-tropomyosin;Tropomyosin alpha-3 chain;Tropomyosin-3;Tropomyosin-5;cDNA FLJ35371 fis, clone SKMUS2001740, highly similar to TROPOMYOSIN ALPHA CHAIN, SKELETAL MUSCLE TYPE	hCG_1997142;RP11-205M9.1-006;TPM3;RP11-205M9.1-002	Tropomyosin 3, isoform CRA_b;tropomyosin 3 isoform 1;cDNA FLJ35371 fis, clone SKMUS2001740, highly similar to TROPOMYOSIN ALPHA CHAIN, SKELETAL MUSCLE TYPE	Q5VU58;Q8TCG3;P06753-1;P06753;Q5VU70;Q8NAH0	9	18	18	2	50	11.7	28.922			1				2	1	26				1.66e-95	0.46238	1.0316	29.198	29	142630000	85026000	57609000
Q15029	36	290;300;361;401;439;451;547;603;675;815;871;921	28	687	IPI00003519;IPI00917777;IPI00903143	IPI00003519;IPI00917777;IPI00903143	12;12;9	12;12;9	12;12;9	116 kDa U5 small nuclear ribonucleoprotein component;Elongation factor Tu GTP-binding domain-containing protein 2;SNU114 homolog;U5 snRNP-specific protein, 116 kDa;cDNA FLJ78483, highly similar to Homo sapiens elongation factor Tu GTP binding domain containing 2 (EFTUD2), mRNA;cDNA FLJ44500 fis, clone UTERU3000828, highly similar to 116 kDa U5 small nuclear ribonucleoprotein component;cDNA FLJ553…	EFTUD2;KIAA0031;SNRP116;U5-116KD	116 kDa U5 small nuclear ribonucleoprotein component;elongation factor Tu GTP binding domain containing 2 isoform b;cDNA FLJ44205 fis, clone THYMU3001379, highly similar to 116 kDa U5 small nuclear ribonucleoprotein component	Q15029;A8KAP3;B3KX19;B4DMC0;Q6IBM8;B4DK30;B4DZB1;Q8IXJ3;B3KWY2	3	12	12	12	15.2	15.2	109.43		14											4.73e-35	0.44778	1.0318	53.479	14	15909000	10105000	5804500
P35579-1	95	34;39;40;54;57;61;63;64;65;80;88;89;127;128;143;156;157;187;188;220;237;272;324;343;344;348;349;355;356;357;358;386;415;427;456;458;462;465;478;479;481;491;492;499;501;502;505;528;533;570;572;616;617;619;621;629;668;709;716;728;741;746;750;756;763;765;767;773;778;791;792;799;800;818;819;850;883;884;890;892;893;895;922;954;973;974;1004;1005;1006;1042;1051;1070;1087	71;72;73;74;75;76;77;78;79;80;81;82;83;84;85;86;87;88	137;146;326;329;484;586;589;627;847;848;871;941;1190;1506;1510;1537;1565;1682	IPI00019502;IPI00395772;IPI00742780;IPI00556012;IPI00790503;IPI00479307;IPI00397526;IPI00878695	IPI00019502;IPI00395772	93;62;24;12;8;8;8;6	93;62;24;12;8;8;8;6	87;57;24;12;5;5;5;6	Cellular myosin heavy chain, type A;Myosin heavy chain 9;Myosin heavy chain, non-muscle IIa;Myosin-9;Non-muscle myosin heavy chain A;Non-muscle myosin heavy chain IIa;cDNA FLJ77145, highly similar to Homo sapiens myosin, heavy polypeptide 9, non-muscle (MYH9), mRNA;cDNA FLJ57040, highly similar to Myosin-9;MYH9 variant protein;Myosin, heavy polypeptide 9, non-muscle, isoform CRA_a;Non-muscle myos…	MYH9;hCG_41454	Isoform 1 of Myosin-9;Isoform 2 of Myosin-9	P35579-1;P35579;A8K6E4;B4E3S1;Q60FE2;Q86XU5;Q99529;P35579-2;Q2PS10;Q9UMJ0	8	93	93	87	46.8	43.7	226.53	177	108	80	26	11	11	8	21	5	6	2	2	0	0.43747	1.0333	24.014	455	8302200000	5223600000	3078600000
A8MY04	134	35;209;353;757;1024			IPI00872387;IPI00871827;IPI00472171;IPI00030179;IPI00794746;IPI00941488;IPI00790291;IPI00793342;IPI00953028;IPI00940164;IPI00069084;IPI00925034;IPI00879277;IPI00926412;IPI00929412;IPI00878826	IPI00872387;IPI00871827;IPI00472171;IPI00030179;IPI00794746;IPI00941488;IPI00790291;IPI00793342	5;5;5;5;4;3;3;3;2;2;1;1;1;1;1;1	5;5;5;5;4;3;3;3;2;2;1;1;1;1;1;1	5;5;5;5;4;3;3;3;2;2;1;1;1;1;1;1	60S ribosomal protein L7;Putative uncharacterized protein RPL7	RPL7	Putative uncharacterized protein RPL7P32 (Fragment);Putative uncharacterized protein RPL7 (Fragment);30 kDa protein;60S ribosomal protein L7;Putative uncharacterized protein RPL7;29 kDa protein;Putative uncharacterized protein RPL7;Putative uncharacterized	A8MY04;A8MVV7;P18124;A8MUD9;C9JIJ5;C9JZ88	16	5	5	5	17.2	17.2	32.418							5						1.16e-10	0.4582	1.0353	30.708	5	7070400	4578800	2491600
Q12905	47	411;1010;1025			IPI00005198;IPI00641665;IPI00643578	IPI00005198;IPI00641665	3;2;1	3;2;1	3;2;1	Interleukin enhancer-binding factor 2;Nuclear factor of activated T-cells 45 kDa;cDNA FLJ51660, highly similar to Interleukin enhancer-binding factor 2;Interleukin enhancer binding factor 2 variant	ILF2;NF45;PRO3063	Interleukin enhancer-binding factor 2;12 kDa protein	Q12905;B4DY09;Q53FG3	3	3	3	3	10.5	10.5	43.062						3							0.0033585	0.53453	1.0359	9.6269	3	3247400	2027600	1219800
P52272-1	147	27;301;419;556;658;659;660	119;120;121;122	457;486;592;596	IPI00171903;IPI00383296	IPI00171903;IPI00383296	7;7	7;7	7;7	Heterogeneous nuclear ribonucleoprotein M;Heterogeneous nuclear ribonucleoprotein M isoform a variant;ORF protein;cDNA FLJ60435, highly similar to Heterogeneous nuclear ribonucleoprotein M;HNRPM protein;Putative uncharacterized protein DKFZp547H118	HNRNPM;HNRPM;NAGR1;ORF;DKFZp547H118	Isoform 1 of Heterogeneous nuclear ribonucleoprotein M;Isoform 2 of Heterogeneous nuclear ribonucleoprotein M	P52272-1;P52272;Q59ES8;Q7KYM9;P52272-2;B4DEG4;Q6P2D7;Q8TCM5	2	7	7	7	13.4	13.4	77.515			11	1		3							1.41e-26	0.43228	1.0402	27.918	15	26303000	15755000	10548000
Q15459	90	240;378;620;753;803;939;1036	68	186	IPI00017451;IPI00470590;IPI00878677;IPI00878312	IPI00017451;IPI00470590	7;6;2;1	7;6;2;1	7;6;2;1	SF3a120;Spliceosome-associated protein 114;Splicing factor 3A subunit 1;cDNA FLJ55438, highly similar to Splicing factor 3 subunit 1	SAP114;SF3A1	Splicing factor 3 subunit 1;splicing factor 3a, subunit 1, 120kDa isoform 2	Q15459;B4E091;C9JAT6	4	7	7	7	11.1	11.1	88.885		7											3.36e-24	0.4755	1.0415	25.042	7	12683000	8277200	4406300
P12314-1	112	315;643;810;986;1097			IPI00023502;IPI00375293;IPI00744353;IPI00383647;IPI00644622;IPI00890744;IPI00941883;IPI00941668;IPI00294221	IPI00023502;IPI00375293;IPI00744353;IPI00383647;IPI00644622;IPI00890744;IPI00941883	5;5;3;3;3;3;3;2;2	5;5;3;3;3;3;3;2;2	5;5;3;3;3;3;3;2;2	Fc-gamma RI;Fc-gamma RIA;High affinity immunoglobulin gamma Fc receptor I;Putative uncharacterized protein FCGR1A;Fc-gamma RIC;Putative high affinity immunoglobulin gamma Fc receptor IC;Fc-gamma RIB;High affinity immunoglobulin gamma Fc receptor IB;Putative uncharacterized protein FCGR1C	FCG1;FCGR1;FCGR1A;IGFR1;FCGR1C;IGFRC;FCGR1B;IGFRB	Isoform A of High affinity immunoglobulin gamma Fc receptor I;Isoform B of High affinity immunoglobulin gamma Fc receptor I;Putative high affinity immunoglobulin gamma Fc receptor IC;Isoform 1 of High affinity immunoglobulin gamma Fc receptor IB;Protein;Is	P12314-1;P12314;P12314-2;C9JSN8;A6NKC4;Q92637-1;Q92637;Q92637-2;C9J771	9	5	5	5	13.6	13.6	42.631			5	4	1								2.39e-12	0.43409	1.0428	25.835	10	23319000	15205000	8114400
P08708	177	150;351;578;786	134;135	105;126	IPI00221093;IPI00791157;IPI00797968;IPI00478114;IPI00844369	IPI00221093;IPI00791157;IPI00797968	4;3;3;1;1	4;3;3;1;1	4;3;3;1;1	40S ribosomal protein S17	RPS17	40S ribosomal protein S17;16 kDa protein;Similar to 40S ribosomal protein S17	P08708	5	4	4	4	43.7	43.7	15.55											2	6	3.3e-20	0.48125	1.0517	27.274	7	25674000	16160000	9513900
P09651-1	157	279;540	126	72	IPI00215965;IPI00760620;IPI00465365;IPI00644968;IPI00954480;IPI00879518;IPI00797148;IPI00909288;IPI00908994;IPI00879501;IPI00742127;IPI00176692;IPI00797902	IPI00215965;IPI00760620;IPI00465365;IPI00644968;IPI00954480;IPI00879518;IPI00797148;IPI00909288;IPI00908994;IPI00879501;IPI00742127;IPI00176692;IPI00797902	2;2;2;2;2;2;2;2;2;1;1;1;1	2;2;2;2;2;2;2;2;2;1;1;1;1	2;2;2;2;2;2;2;2;2;1;1;1;1	Helix-destabilizing protein;Heterogeneous nuclear ribonucleoprotein A1;hnRNP core protein A1;Single-strand RNA-binding protein;HNRPA1 protein;Putative uncharacterized protein;hnRNP core protein A1-like 3;Putative heterogeneous nuclear ribonucleoprotein A1-like 3;Putative uncharacterized protein ENSP00000383298;cDNA FLJ51586, moderately similar to Heterogeneous nuclear ribonucleoprotein A1;cDNA FL…	HNRNPA1;HNRPA1;HNRPA1L3;HNRNPA1L;HNRNPA1L2	Isoform A1-B of Heterogeneous nuclear ribonucleoprotein A1;Similar to Heterogeneous nuclear ribonucleoprotein A1;Isoform A1-A of Heterogeneous nuclear ribonucleoprotein A1;Putative heterogeneous nuclear ribonucleoprotein A1-like protein 3;Heterogeneous nuc	P09651-1;P09651;P09651-2;Q3MI39;Q6IPF2;Q9BSM5;P0C7M2;Q0VAC0;C9JCD7;P09651-3;B4E0B5;B4DP35;C9JV67;Q32P51	13	2	2	2	10.5	10.5	38.845									2				3.81e-27	0.49102	1.0571	0.23334	2	2400900	1297400	1103500
P23284	246	153;347;369;826;882;952;953;994;999;1000;1015;1057	176	101	IPI00646304;IPI00791367	IPI00646304;IPI00791367	12;8	12;8	12;8	Cyclophilin B;CYP-S1;Peptidyl-prolyl cis-trans isomerase B;Rotamase B;S-cyclophilin	CYPB;PPIB	Peptidyl-prolyl cis-trans isomerase B;20 kDa protein	P23284	2	12	12	12	59.7	59.7	23.742											15	18	1.34e-55	0.47447	1.0609	18.261	33	80518000	51547000	28971000
P23528	72	96;550			IPI00012011;IPI00909841	IPI00012011;IPI00909841	2;1	2;1	2;1	18 kDa phosphoprotein;Cofilin, non-muscle isoform;Cofilin-1;cDNA FLJ51435, moderately similar to Cofilin-1	CFL;CFL1	Cofilin-1;cDNA FLJ51435, moderately similar to Cofilin-1	P23528;B4E112	2	2	2	2	15.7	15.7	18.502												2	3.83e-09	0.48886	1.0683	9.1966	2	4539900	2997800	1542100
P40939	137	125;228;261;280;298;332;346;627;667;672;902;911;913;929;956;996	107;108;109;110;111;112;113;114	191;200;201;273;372;497;506;622	IPI00031522;IPI00908351	IPI00031522	16;6	16;6	16;6	78 kDa gastrin-binding protein;Long chain 3-hydroxyacyl-CoA dehydrogenase;Long-chain enoyl-CoA hydratase;TP-alpha;Trifunctional enzyme subunit alpha, mitochondrial;cDNA FLJ53969, highly similar to Trifunctional enzyme subunit alpha, mitochondrial;cDNA FLJ54509, highly similar to Trifunctional enzyme subunit alpha, mitochondrial;Putative uncharacterized protein HADHA;Trifunctional protein alpha-su…	HADH;HADHA	Trifunctional enzyme subunit alpha, mitochondrial	P40939;B4DDZ5;B4DRH6;Q53T69;Q53TA2;Q9UQC5	2	16	16	16	27.5	27.5	82.999			18										1.26e-55	0.45919	1.069	11.79	18	24359000	15112000	9246800
P46776	234	420;898			IPI00456758	IPI00456758	2	2	2	60S ribosomal protein L27a;Ribosomal protein L27a	RPL27A;L27a	60S ribosomal protein L27a	P46776;Q6NZ52;Q9BQQ5	1	2	2	2	16.2	16.2	16.561												3	0.00023402	0.45842	1.0746	17.42	3	2920300	1949600	970720
P52907	48	10;161;230;257;432;589			IPI00005969;IPI00873484;IPI00026182;IPI00873113;IPI00852796;IPI00952611;IPI00853571	IPI00005969;IPI00873484	6;5;1;1;1;1;1	6;5;1;1;1;1;1	6;5;1;1;1;1;1	CapZ alpha-1;F-actin-capping protein subunit alpha-1;cDNA FLJ75422, highly similar to Homo sapiens capping protein (actin filament) muscle Z-line, alpha 1, mRNA	CAPZA1	F-actin-capping protein subunit alpha-1;Putative uncharacterized protein CAPZA1 (Fragment)	P52907;A8K0T9;A8MV55	7	6	6	6	29	29	32.922								7	5				3.01e-45	0.47158	1.0775	43.265	12	183050000	25565000	157490000
O15144	45	109;110;149;662;983;1030;1071	41;42	1;152	IPI00005161;IPI00000477;IPI00925920;IPI00926315;IPI00927156;IPI00925705	IPI00005161;IPI00000477	7;4;2;2;1;1	7;4;2;2;1;1	7;4;2;2;1;1	Actin-related protein 2/3 complex subunit 2;Arp2/3 complex 34 kDa subunit;Actin related protein 2/3 complex, subunit 2, 34kDa, isoform CRA_a;cDNA FLJ76076, highly similar to Homo sapiens actin related protein 2/3 complex, subunit 2, 34kDa (ARPC2), transcript variant 2, mRNA;Putative uncharacterized protein ARPC2;PNAS-139	ARC34;ARPC2;PRO2446;hCG_16304	Actin-related protein 2/3 complex subunit 2;PNAS-139	O15144;Q53R19;Q9BXV5	6	7	7	7	22	22	34.333									14				3.2e-28	0.52583	1.0798	20.476	14	16879000	10434000	6444600
P62847-1	132	496;769;947;949	105;106	23;74	IPI00915363;IPI00942970;IPI00029750;IPI00915463;IPI00903204;IPI00943336;IPI00847986	IPI00915363;IPI00942970;IPI00029750;IPI00915463;IPI00903204;IPI00943336;IPI00847986	4;4;4;4;4;4;4	4;4;4;4;4;4;4	4;4;4;4;4;4;4	40S ribosomal protein S24	RPS24;hCG_22610;RP11-6P10.1-001;RP11-6P10.1-003	ribosomal protein S24 isoform d;16 kDa protein;Isoform 1 of 40S ribosomal protein S24;ribosomal protein S24 isoform e;15 kDa protein;ribosomal protein S24 isoform f;Isoform 2 of 40S ribosomal protein S24	P62847-1;P62847;Q5T0P7;Q7Z3D1;P62847-2;Q5T0P8	7	4	4	4	13.5	13.5	32.43												4	3.28e-13	0.47782	1.0799	11.952	4	4447900	3058700	1389200
P67936-1	68	423;424;474;488;489;519;520;638;795;796			IPI00010779;IPI00216975;IPI00910322	IPI00010779;IPI00216975;IPI00910322	10;9;5	4;3;1	3;2;1	TM30p1;Tropomyosin alpha-4 chain;Tropomyosin-4;cDNA FLJ54184, highly similar to Tropomyosin alpha-4 chain;cDNA FLJ52936, weakly similar to Tropomyosin alpha-4 chain	TPM4	Isoform 1 of Tropomyosin alpha-4 chain;Isoform 2 of Tropomyosin alpha-4 chain;cDNA FLJ52936, weakly similar to Tropomyosin alpha-4 chain	P67936-1;P67936;B4DVY2;P67936-2;B4DTB1	3	10	4	3	14.5	14.5	28.521									5				1.06e-43	0.43209	1.0816	21.044	5	6773800	4441000	2332900
P31943	84	100;868;1045;1076	63	345	IPI00479191;IPI00013881;IPI00026230;IPI00940955;IPI00908896;IPI00923539	IPI00479191;IPI00013881;IPI00026230;IPI00940955;IPI00908896	4;4;2;2;2;1	4;4;2;2;2;1	3;3;2;2;1;1	Heterogeneous nuclear ribonucleoprotein H;Heterogeneous nuclear ribonucleoprotein H, N-terminally processed;Putative uncharacterized protein DKFZp686A15170;FTP-3;Heterogeneous nuclear ribonucleoprotein H;Heterogeneous nuclear ribonucleoprotein H2;cDNA FLJ57964, highly similar to Heterogeneous nuclear ribonucleoprotein H;cDNA FLJ54533, highly similar to Heterogeneous nuclear ribonucleoprotein H	HNRNPH1;HNRPH;HNRPH1;DKFZp686A15170;FTP3;HNRNPH2;HNRPH2	51 kDa protein;Heterogeneous nuclear ribonucleoprotein H;Heterogeneous nuclear ribonucleoprotein H2;cDNA FLJ57964, highly similar to Heterogeneous nuclear ribonucleoprotein H;cDNA FLJ54533, highly similar to Heterogeneous nuclear ribonucleoprotein H	P31943;Q68DG4;P55795;A1L400;B4DFK9;B4DP51	6	4	4	3	12.9	9.3	51.229					5								6.23e-53	0.43435	1.0885	41.49	5	11510000	7250400	4259400
P11940-1	60	56;173;174;250;277;278;319;444;683;705;821;837	59;60	72;202	IPI00008524;IPI00410017;IPI00796945;IPI00909378;IPI00301154;IPI00794246;IPI00790842;IPI00556259;IPI00306870;IPI00061206;IPI00432527;IPI00217142;IPI00796139	IPI00008524;IPI00410017;IPI00796945;IPI00909378;IPI00301154;IPI00794246	12;12;11;11;8;7;3;2;2;1;1;1;1	12;12;11;11;8;7;3;2;2;1;1;1;1	10;10;9;9;7;6;2;2;2;1;1;1;1	Polyadenylate-binding protein 1;cDNA FLJ57246, highly similar to Poly(A)-binding protein 1;cDNA FLJ37875 fis, clone BRSSN2018771, highly similar to Poly(A)-binding protein 1;cDNA FLJ59219, highly similar to Poly(A)-binding protein 1;Polyadenylate-binding protein 3;Testis-specific poly(A)-binding protein;PABP3;Poly(A) binding protein, cytoplasmic 3;cDNA, FLJ93858, highly similar to Homo sapiens po…	PAB1;PABP1;PABPC1;PABPC2;PABP3;PABPC3;PABPL3;hCG_1774619;RP11-165I9.5-001	Isoform 1 of Polyadenylate-binding protein 1;Isoform 2 of Polyadenylate-binding protein 1;cDNA FLJ37875 fis, clone BRSSN2018771, highly similar to Poly(A)-binding protein 1;cDNA FLJ59219, highly similar to Poly(A)-binding protein 1;Polyadenylate-binding pr	P11940-1;P11940;B4DZW4;P11940-2;B3KT93;B4DQX0;Q9H361;Q2VIP3;Q3ZCS4;Q5VX58	13	12	12	10	22	19	70.67			14			1							4.37e-32	0.47331	1.1023	27.983	15	37565000	25161000	12403000
Q53HL1	139	102;129;169;191;253;254;255;302;470;602	116;117;118	30;62;135	IPI00604523;IPI00033494;IPI00220573;IPI00719669;IPI00921274;IPI00642780;IPI00376572;IPI00888438;IPI00647211	IPI00604523;IPI00033494;IPI00220573;IPI00719669;IPI00921274	10;10;10;9;9;4;2;2;1	10;10;10;9;9;4;2;2;1	6;6;6;6;6;0;0;0;0	Myosin regulatory light chain MRCL3 variant;MLC-2A;Myosin regulatory light chain 12B;Myosin regulatory light chain 20 kDa;Myosin regulatory light chain 2-B, smooth muscle isoform;Myosin regulatory light chain MRLC2;SHUJUN-1;MLC-2B;Myosin regulatory light chain 12A;Myosin regulatory light chain 2, nonsarcomeric;Myosin regulatory light chain MRLC3;Myosin RLC;Myosin regulatory light chain;cDNA FLJ76…	MRLC2;MYL12B;MYLC2B;MLCB;MRLC3;MYL12A;RLC;hCG_2045956;MRCL3	Myosin regulatory light chain MRCL3 variant;Myosin regulatory light chain 12B;Myosin regulatory light chain 12A;Myosin regulatory light chain;myosin regulatory light chain MRCL2 isoform B	Q53HL1;O14950;P19105;Q2F834;Q53X45;C9JKZ0	9	10	10	6	53.1	20.9	20.457											1	21	7.62e-159	0.47303	1.1027	23.082	22	380170000	236730000	143440000
P13010	173	81;223;292;330;334;459;476;549;631;864;924;1007;1074	132;133	84;357	IPI00220834;IPI00871391;IPI00925823;IPI00926445	IPI00220834	13;3;2;1	13;3;2;1	13;3;2;1	86 kDa subunit of Ku antigen;ATP-dependent DNA helicase 2 subunit 2;ATP-dependent DNA helicase II 80 kDa subunit;CTC box-binding factor 85 kDa subunit;DNA repair protein XRCC5;Ku80;Ku86;Lupus Ku autoantigen protein p86;Nuclear factor IV;Thyroid-lupus autoantigen;X-ray repair complementing defective repair in Chinese hamster cells 5 (double-strand-break rejoining);X-ray repair cross-complementing …	G22P2;XRCC5	ATP-dependent DNA helicase 2 subunit 2	P13010;Q53T09;Q53TC2	4	13	13	13	21.9	21.9	82.704		16	5										2.2e-25	0.48761	1.1167	19.488	20	25644000	16060000	9583700
P08238	223	14;71;472;722;784;1001			IPI00414676;IPI00382470;IPI00784295;IPI00555614;IPI00555565;IPI00455599;IPI00031523;IPI00910046;IPI00514027;IPI00411633	IPI00414676	6;2;2;2;1;1;1;1;1;1	6;2;2;2;1;1;1;1;1;1	6;2;2;2;1;1;1;1;1;1	Heat shock 84 kDa;Heat shock protein HSP 90-beta;cDNA FLJ77842;cDNA FLJ53619, highly similar to Heat shock protein HSP 90-beta;cDNA FLJ54023, highly similar to Heat shock protein HSP 90-beta;HSP90AB1 protein;cDNA: FLJ21717 fis, clone COL10322	HSP90AB1;HSP90B;HSPC2;HSPCB	Heat shock protein HSP 90-beta	P08238;A8K3W9;B4DGL0;B4DMA2;Q6PK50;Q9H6X9	10	6	6	6	10.5	10.5	83.263		6											7.95e-17	0.46481	1.1274	33.155	6	7849600	5308100	2541500
O94906	196	6;221;624			IPI00305068;IPI00943860	IPI00305068	3;1	3;1	3;1	Pre-mRNA-processing factor 6;PRP6 homolog;U5 snRNP-associated 102 kDa protein;cDNA, FLJ95067;cDNA FLJ10692 fis, clone NT2RP3000361, highly similar to Pre-mRNA-processing factor 6 homolog	C20orf14;PRPF6	Pre-mRNA-processing factor 6	O94906;B2RAR5;B3KMC6	2	3	3	3	4.7	4.7	106.92		3											2.24e-09	0.52095	1.1411	35.625	3	1673400	1003300	670130
P06753-2	165	31;32;68;423;424;425;426;475;486;487;519;520;637;657;666;795;796;909	128;129	105;237	IPI00218319;IPI00479185;IPI00218320;IPI00477649;IPI00642042;IPI00909961;IPI00854592;IPI00643370;IPI00940343;IPI00940084;IPI00941861;IPI00216135;IPI00000230;IPI00604537;IPI00216134;IPI00921977;IPI00384369;IPI00018853;IPI00745267;IPI00844078;IPI00900375;IPI00909308;IPI00640264;IPI00941379	IPI00218319;IPI00479185;IPI00218320;IPI00477649;IPI00642042;IPI00909961;IPI00854592	18;18;16;16;16;12;11;7;6;6;6;6;6;6;6;6;6;6;6;5;4;4;2;1	2;2;0;0;2;2;2;2;0;0;0;0;0;0;0;0;0;0;0;0;0;0;2;0	2;2;0;0;2;2;2;2;0;0;0;0;0;0;0;0;0;0;0;0;0;0;2;0	Gamma-tropomyosin;Tropomyosin alpha-3 chain;Tropomyosin-3;Tropomyosin-5;cDNA, FLJ96568, highly similar to Homo sapiens tropomyosin 3 (TPM3), mRNA;Tropomyosin 3;cDNA FLJ50612, highly similar to Rattus norvegicus tropomyosin 3, gamma (Tpm3), transcript variant 2, mRNA;Cytoskeletal tropomyosin isoform (2.5 kb);Cytoskeletal tropomyosin TM30;Tropomyosin 3, isoform CRA_a;Putative uncharacterized protei…	TPM3;RP11-205M9.1-009;RP11-205M9.1-005;OK/SW-cl.5;hCG_1997142;RP11-205M9.1-010;DKFZp686J1372;RP11-205M9.1-003	Isoform 2 of Tropomyosin alpha-3 chain;tropomyosin 3 isoform 4;Isoform 3 of Tropomyosin alpha-3 chain;tropomyosin 3 isoform 5;Putative uncharacterized protein DKFZp686J1372;cDNA FLJ50720, highly similar to Homo sapiens tropomyosin 3 (TPM3), transcript vari	P06753-2;P06753;B2RDE1;Q5VU66;P06753-3;B4DQ80;Q5VU61;Q6LDX7;Q8NI98;Q5VU72;Q5HYB6;Q5VU59;B4DWT5;Q8NAG3	24	18	2	2	8.9	8.9	29.032									6				8.42e-91	0.50681	1.1417	17.915	2	4291000	1903700	2387300
P11142-1	37	94;122;389;390;526;591;592;663;673;674;726;727;730;780;787;816;863;951;957	29;30;31;32	61;122;237;549	IPI00003865;IPI00037070;IPI00939595;IPI00910870;IPI00007702;IPI00877807;IPI00339269;IPI00902596;IPI00844513;IPI00830052;IPI00942547;IPI00940553;IPI00909073;IPI00011134;IPI00939526;IPI00880019;IPI00910047;IPI00941328	IPI00003865;IPI00037070;IPI00939595;IPI00910870	19;18;18;10;6;4;3;3;3;2;2;2;1;1;1;1;1;1	19;18;18;10;6;4;3;3;3;2;2;2;1;1;1;1;1;1	17;16;16;8;4;3;2;2;3;0;0;0;0;0;0;1;0;0	Heat shock 70 kDa protein 8;Heat shock cognate 71 kDa protein;cDNA FLJ77848;cDNA FLJ38781 fis, clone LIVER2000216, highly similar to HEAT SHOCK COGNATE 71 kDa PROTEIN;cDNA FLJ55485, highly similar to Heat shock cognate 71 kDa protein;Heat shock 70kDa protein 8 isoform 1 variant;Putative uncharacterized protein;HSPA8 protein;cDNA FLJ20564 fis, clone KAT12033;Uncharacterized bone marrow protein BM0…	HSC70;HSP73;HSPA10;HSPA8	Isoform 1 of Heat shock cognate 71 kDa protein;54 kDa protein;Isoform 2 of Heat shock cognate 71 kDa protein;cDNA FLJ59163, highly similar to Heat shock cognate 71 kDa protein	P11142-1;P11142;A8K7Q2;B3KTV0;B4E1Q1;Q53GZ6;Q96BE0;Q96H53;Q96IS6;Q9NWW3;Q9NZ87;P11142-2;Q53HF2;B4DTX2	18	19	19	17	31.1	29.1	70.897			37	2									2.47e-155	0.48057	1.1419	19.925	39	150300000	97784000	52512000
P12956	243	29;152;259;404;405;416;493;495;555;696;751;758;811;896;977	170;171;172	167;203;580	IPI00644712;IPI00889791;IPI00893062;IPI00893179	IPI00644712;IPI00889791;IPI00893062;IPI00893179	15;14;14;11	15;14;14;11	15;14;14;11	70 kDa subunit of Ku antigen;ATP-dependent DNA helicase 2 subunit 1;ATP-dependent DNA helicase II 70 kDa subunit;CTC box-binding factor 75 kDa subunit;DNA repair protein XRCC6;Lupus Ku autoantigen protein p70;Thyroid-lupus autoantigen;X-ray repair complementing defective repair in Chinese hamster cells 6;X-ray repair cross-complementing protein 6;cDNA, FLJ96699, highly similar to Homo sapiens thy…	G22P1;XRCC6;CTA-216E10.7-002;hCG_2013151;CTA-216E10.7-005;CTA-216E10.7-004	ATP-dependent DNA helicase 2 subunit 1;X-ray repair complementing defective repair in Chinese hamster cells 6 (Ku autoantigen, 70kDa), isoform CRA_b;X-ray repair complementing defective repair in Chinese hamster cells 6;X-ray repair complementing defective	P12956;B2RDN9;B1AHC8;B1AHC9;B4DE32;B4E356;Q6IC76;B1AHC7	4	15	15	15	30.4	30.4	69.842			23										4.53e-44	0.48596	1.1434	15.858	23	50547000	29033000	21513000
P42766	219	764;1027			IPI00412607;IPI00550247;IPI00455757	IPI00412607;IPI00550247;IPI00455757	2;2;1	2;2;1	2;2;1	60S ribosomal protein L35;Similar to 60S ribosomal protein L35	RPL35;LOC154880;tcag7.829	60S ribosomal protein L35;Protein;Similar to 60S ribosomal protein L35	P42766;A4D2M5	3	2	2	2	22	22	14.551											1	4	1.24e-25	0.51014	1.1438	27.519	5	44372000	28155000	16217000
P35268	169	36;441;442;720;830;831			IPI00219153;IPI00878392;IPI00879364	IPI00219153;IPI00878392	6;6;1	6;6;1	5;5;1	60S ribosomal protein L22;EBER-associated protein;Epstein-Barr virus small RNA-associated protein;Heparin-binding protein HBp15;Ribosomal protein L22-like 2;Ribosomal protein L22	RPL22;RPL22L2	60S ribosomal protein L22;11 kDa protein	P35268;B8Y929;Q7Z4W8;Q8WYP0;Q9BYF5	3	6	6	5	27.3	21.1	14.787											1	10	8.75e-39	0.49683	1.1678	10.928	11	251930000	154410000	97523000
O60506-1	92	37;142;597	69;70	194;195	IPI00018140;IPI00402182;IPI00402183;IPI00930205;IPI00402184;IPI00402185;IPI00941649;IPI00644055;IPI00012074;IPI00856038;IPI00856037;IPI00910614	IPI00018140;IPI00402182;IPI00402183;IPI00930205;IPI00402184;IPI00402185	3;3;3;3;3;3;1;1;1;1;1;1	3;3;3;3;3;3;1;1;1;1;1;1	3;3;3;3;3;3;1;1;1;1;1;1	Glycine- and tyrosine-rich RNA-binding protein;Heterogeneous nuclear ribonucleoprotein Q;NS1-associated protein 1;Synaptotagmin-binding, cytoplasmic RNA-interacting protein;cDNA, FLJ94136, highly similar to Homo sapiens synaptotagmin binding, cytoplasmic RNA interacting protein (SYNCRIP), mRNA;Synaptotagmin binding, cytoplasmic RNA interacting protein variant;SYNCRIP protein;Synaptotagmin binding…	HNRPQ;NSAP1;SYNCRIP;RP1-3J17.2-003;hCG_401112	Isoform 1 of Heterogeneous nuclear ribonucleoprotein Q;Isoform 2 of Heterogeneous nuclear ribonucleoprotein Q;Isoform 3 of Heterogeneous nuclear ribonucleoprotein Q;synaptotagmin binding, cytoplasmic RNA interacting protein isoform 5;Isoform 4 of Heterogen	O60506-1;O60506;B2R8Z8;O60506-2;O60506-3;Q59GL1;O60506-4;Q05CK9;Q5TCG1;O60506-5;B7Z213;B7Z645	12	3	3	3	5.1	5.1	69.602			3										8.07e-08	0.4855	1.1683	32.883	3	1877000	1051900	825130
Q00839-1	236	22;184;317;322;685;686;865;1089	166	534	IPI00883857;IPI00479217;IPI00644224;IPI00644079;IPI00915829	IPI00883857;IPI00479217;IPI00644224;IPI00644079;IPI00915829	8;8;8;8;6	8;8;8;8;6	8;8;8;8;6	Heterogeneous nuclear ribonucleoprotein U;p120;pp120;Scaffold attachment factor A;cDNA FLJ44920 fis, clone BRAMY3011501, highly similar to Heterogeneous nuclear ribonucleoprotein U;Heterogeneous nuclear ribonucleoprotein U (Scaffold attachment factor A);cDNA FLJ54020, highly similar to Heterogeneous nuclear ribonucleoprotein U;HNRPU protein;Heterogeneous nuclear ribonucleoprotein U (Scaffold atta…	HNRNPU;HNRPU;SAFA;U21.1;RP11-11N7.3-002;RP11-11N7.3-003;RP11-11N7.3-004;hCG_22289	Isoform Long of Heterogeneous nuclear ribonucleoprotein U;Isoform Short of Heterogeneous nuclear ribonucleoprotein U;cDNA FLJ54020, highly similar to Heterogeneous nuclear ribonucleoprotein U;HNRPU protein;Heterogeneous nuclear ribonucleoprotein U	Q00839-1;Q00839;B3KX72;Q5RI17;Q00839-2;Q9UEL2;B4DLR3;Q5RI18;Q96BA7;Q5RI19;Q7Z4Q5	5	8	8	8	13.7	13.7	90.583		10	1										1.63e-65	0.5341	1.2066	24.812	11	18061000	11092000	6968900
Q9Y3Z3-1	184	229;282;384;812			IPI00294739;IPI00943982	IPI00294739;IPI00943982	4;3	4;3	4;3	Dendritic cell-derived IFNG-induced protein;Monocyte protein 5;SAM domain and HD domain-containing protein 1;cDNA FLJ51783, highly similar to SAM domain and HD domain-containing protein 1;SAM domain-and HD domain-containing protein 1 variant	MOP5;SAMHD1	Isoform 1 of SAM domain and HD domain-containing protein 1;Isoform 2 of SAM domain and HD domain-containing protein 1	Q9Y3Z3-1;Q9Y3Z3;B4E3N3;Q59H15;Q9Y3Z3-2	2	4	4	4	6.4	6.4	72.2			5										0.030832	0.51822	1.214	29.878	5	3091300	1838100	1253200
P68104	216	177;377;607;901;975;1099	153	276	IPI00396485;IPI00472724;IPI00025447;IPI00940393;IPI00014424;IPI00180730;IPI00556204;IPI00941522;IPI00938077;IPI00382804;IPI00879622;IPI00431701;IPI00431441;IPI00935896	IPI00396485;IPI00472724;IPI00025447;IPI00940393;IPI00014424;IPI00180730;IPI00556204;IPI00941522	6;6;5;5;4;3;3;3;2;2;1;1;1;1	6;6;5;5;4;3;3;3;2;2;1;1;1;1	6;6;5;5;4;3;3;3;2;2;1;1;1;1	Elongation factor 1-alpha 1;Elongation factor Tu;Eukaryotic elongation factor 1 A-1;Leukocyte receptor cluster member 7;Elongation factor 1-alpha;Eukaryotic translation elongation factor 1 alpha;cDNA FLJ54032, highly similar to Elongation factor 1-alpha 1;Eukaryotic elongation factor 1 A-like 3;Putative elongation factor 1-alpha-like 3;Eukaryotic translation elongation factor 1 alpha 1;EEF1A1 pro…	EEF1A;EEF1A1;EF1A;LENG7;EEF1A1L14;PTI-1;hCG_2033271;RP11-505P4.2-001;EEF1AL3;RP11-505P4.2-015;RP11-505P4.2-003;EEF1A2;EEF1AL;STN	Elongation factor 1-alpha 1;Putative elongation factor 1-alpha-like 3;Elongation factor 1-alpha;Elongation factor 1-alpha;Elongation factor 1-alpha 2;Similar to Elongation factor 1-alpha 1;Eukaryotic translation elongation factor 1 alpha 2 variant (Fragmen	P68104;A8K9C4;A9X7H1;B4DV42;B4E2C5;Q16577;Q53G85;Q53G89;Q53GA1;Q53GE9;Q53HM9;Q53HQ7;Q53HR1;Q53HR5;Q6IPN6;Q6IPS9;Q6IPT9;Q8IUB0;Q96RE1;Q9H2I7;Q9NZS6;Q5VTE0;Q5JR01;A6PW80;Q2F837;Q504Z0;Q6IQ15;Q6P082;Q6P4C9;Q8TBL1;Q96C29;Q96CD8;Q96EB3;B4DNE0;Q05639;Q59GP5	14	6	6	6	17.7	17.7	50.14						8	1	1	2				1.21e-27	0.62846	1.2316	10.63	12	50103000	29919000	20184000
P14678-3	124	274;372;805;1017	100	80	IPI00329512;IPI00877103;IPI00844420;IPI00785142;IPI00027285;IPI00220360;IPI00395674;IPI00384173;IPI00793157	IPI00329512;IPI00877103;IPI00844420;IPI00785142;IPI00027285;IPI00220360;IPI00395674;IPI00384173	4;4;4;4;4;4;4;3;1	4;4;4;4;4;4;4;3;1	4;4;4;4;4;4;4;3;1	Sm protein B/B;Small nuclear ribonucleoprotein-associated proteins B and B;Putative uncharacterized protein SNRPB;SNRPB protein;cDNA FLJ41124 fis, clone BRACE2014850, highly similar to Small nuclear ribonucleoprotein-associated protein N;Small nuclear ribonucleoprotein polypeptide N variant;cDNA FLJ56740, highly similar to Small nuclear ribonucleoprotein-associatedproteins B and B;Small nuclear r…	COD;SNRPB;SNRPB1;hCG_2039421;HCERN3;SMN;SNRPN	Isoform SM-B1 of Small nuclear ribonucleoprotein-associated proteins B and B;Putative uncharacterized protein SNRPB;30 kDa protein;cDNA FLJ41124 fis, clone BRACE2014850, highly similar to Small nuclear ribonucleoprotein-associated protein N;Isoform SM-B	P14678-3;P14678;A8MT02;Q15182;B3KVR1;Q53HE7;P14678-1;B4DVS0;Q5XPV6;P63162;Q6LBS1;Q9UKR4;P14678-2;B4DVD6;Q66K91;Q9UIS4	9	4	4	4	12.8	12.8	30.032							4						6.7e-05	0.49469	1.2432	45.265	4	13017000	8249900	4767100
P07910-1	161	276;661;981;982	127	74	IPI00477313;IPI00216592;IPI00909232;IPI00759596;IPI00910718;IPI00910666;IPI00868835;IPI00027569;IPI00735540;IPI00887991;IPI00759822;IPI00877664	IPI00477313;IPI00216592;IPI00909232;IPI00759596;IPI00910718;IPI00910666;IPI00868835;IPI00027569;IPI00735540;IPI00887991;IPI00759822;IPI00877664	4;4;4;4;4;4;3;2;2;2;2;2	4;4;4;4;4;4;3;2;2;2;2;2	4;4;4;4;4;4;3;2;2;2;2;2	Heterogeneous nuclear ribonucleoproteins C1/C2;cDNA FLJ75154, highly similar to Homo sapiens heterogeneous nuclear ribonucleoprotein C (C1/C2), mRNA;cDNA, FLJ92712, highly similar to Homo sapiens heterogeneous nuclear ribonucleoprotein C (C1/C2) (HNRPC), transcript variant 1, mRNA;cDNA, FLJ92657, highly similar to Homo sapiens heterogeneous nuclear ribonucleoprotein C (C1/C2) (HNRPC), transcript …	HNRNPC;HNRPC;HNRNPCL1;HNRPCL1;LOC440563;LOC649330	Isoform C2 of Heterogeneous nuclear ribonucleoproteins C1/C2;Isoform C1 of Heterogeneous nuclear ribonucleoproteins C1/C2;cDNA FLJ53542, highly similar to Heterogeneous nuclear ribonucleoproteins C;Isoform 4 of Heterogeneous nuclear ribonucleoproteins C1/C	P07910-1;P07910;A8K9A4;B2R603;P07910-2;B2R5W2;B3KX96;B4DY08;P07910-4;B4DSU6;B4DMJ1;O60812;B2RP44;B7ZW41;Q6PKD2;B2RXH8;B7ZW38;P07910-3;Q569J8	12	4	4	4	13.1	13.1	33.67						1		6					5.37e-59	0.64516	1.2614	17.705	7	17516000	9735900	7780300
O75643-1	230	645;694;936			IPI00420014;IPI00740142;IPI00927472;IPI00937839;IPI00735397	IPI00420014;IPI00740142	3;3;1;1;1	3;3;1;1;1	3;3;1;1;1	Activating signal cointegrator 1 complex subunit 3-like 1;BRR2 homolog;U5 small nuclear ribonucleoprotein 200 kDa helicase;U5 snRNP-specific 200 kDa protein;SNRNP200 protein;cDNA FLJ55548, highly similar to U5 small nuclear ribonucleoprotein 200 kDa helicase (EC 3.6.1.-);cDNA FLJ13778 fis, clone PLACE4000431, highly similar to H.sapiens U5 snRNP-specific 200kD protein;PRO2281;Putative RNA helicase	ASCC3L1;HELIC2;KIAA0788;SNRNP200	Isoform 1 of U5 small nuclear ribonucleoprotein 200 kDa helicase;similar to U5 snRNP-specific 200kD protein, partial	O75643-1;O75643;A2RRQ7;A4FU77;B4E150;Q5ZF01;Q7L5W4;Q9H8B9;Q9P172;Q9UNV9	5	3	3	3	1.8	1.8	244.5	3												0.00012527	0.54293	1.2638	15.873	3	8516800	5144900	3371900
Q6P2Q9	59	226;244;363;885	58	1474	IPI00007928	IPI00007928	4	4	4	220 kDa U5 snRNP-specific protein;p220;Pre-mRNA-processing-splicing factor 8;PRP8 homolog;Splicing factor Prp8;cDNA FLJ57882, highly similar to Pre-mRNA-processing-splicing factor 8;U5 snRNP-specific protein variant;Apoptosis-regulated protein 1;Apoptosis-regulated protein 2	PRPC8;PRPF8	Pre-mRNA-processing-splicing factor 8	Q6P2Q9;B4DK16;Q53GM6;Q6JH02;Q6JH03	1	4	4	4	1.9	1.9	273.6	4												4.79e-05	0.58743	1.2727	32.966	4	10015000	5711300	4303700
P05141	54	8;126;270			IPI00007188	IPI00007188	3	3	2	Adenine nucleotide translocator 2;ADP,ATP carrier protein 2;ADP,ATP carrier protein, fibroblast isoform;ADP/ATP translocase 2;Solute carrier family 25 member 5;cDNA, FLJ96310, highly similar to Homo sapiens solute carrier family 25 (mitochondrial carrier; adenine nucleotide translocator), member 5 (SLC25A5), mRNA;SLC25A5 protein	ANT2;SLC25A5	ADP/ATP translocase 2	P05141;B2RCV1;Q6NVC0	1	3	3	2	10.7	8.1	32.895							3						5.79e-09	0.61864	1.273	13.099	3	4181400	2624300	1557200
C9JWM7	241	20;190;443;494;866;880;1018	169	145	IPI00925052;IPI00925334;IPI00554811;IPI00790262;IPI00926054;IPI00926232;IPI00386354;IPI00607772;IPI00924833;IPI00925522	IPI00925052;IPI00925334;IPI00554811;IPI00790262;IPI00926054;IPI00926232;IPI00386354	7;7;7;5;5;5;4;3;1;1	7;7;7;5;5;5;4;3;1;1	7;7;7;5;5;5;4;3;1;1	Putative uncharacterized protein ARPC4;Actin-related protein 2/3 complex subunit 4;Arp2/3 complex 20 kDa subunit;cDNA FLJ14048 fis, clone HEMBA1006650, weakly similar to ARP2/3 COMPLEX 20 KD SUBUNIT	ARPC4;ARC20	Putative uncharacterized protein ARPC4;Putative uncharacterized protein ARPC4;Actin-related protein 2/3 complex subunit 4;Similar to Actin-related protein 2/3 complex subunit 4;Putative uncharacterized protein ARPC4;Putative uncharacterized protein ARPC4;c	C9JWM7;C9J0N8;P59998;C9JUB3;C9JE29;Q9H7Z5	10	7	7	7	40.1	40.1	21.588												7	1.79e-20	0.55213	1.2804	11.138	7	44895000	28466000	16429000
Q8NE71-1	82	797;869			IPI00873899;IPI00013495	IPI00873899;IPI00013495	2;2	2;2	2;2	ATP-binding cassette 50;ATP-binding cassette sub-family F member 1;TNF-alpha-stimulated ABC protein;ATP-binding cassette sub-family F (GCN20) member 1;ATP-binding cassette, sub-family F (GCN20), member 1;ATP-binding cassette, sub-family F, member 1 variant;ABC50 protein;ATP-binding cassette, sub-family F (GCN20), member 1, isoform CRA_a	ABC50;ABCF1;DADB-129D20.7-001;DAMA-178G23.9-001;DAMC-83F13.6-001;DASS-182C6.1-001;DADB-129D20.7-002;DAMA-178G23.9-002;DAMC-83F13.6-002;DASS-182C6.1-002;hCG_26012	Isoform 1 of ATP-binding cassette sub-family F member 1;Isoform 2 of ATP-binding cassette sub-family F member 1	Q8NE71-1;Q8NE71;A2BF75;Q59F96;Q8NE71-2;Q2L6I2	2	2	2	2	3.4	3.4	95.925		2											0.00080831	0.51708	1.2807	7.4913	2	825770	455160	370610
P11021	35	53;106;123;236;389;391;440;477;724;725;862;918;1047	26;27	197;333	IPI00003362	IPI00003362	13	12	12	78 kDa glucose-regulated protein;Endoplasmic reticulum lumenal Ca(2+)-binding protein grp78;Heat shock 70 kDa protein 5;Immunoglobulin heavy chain-binding protein;cDNA FLJ60062, highly similar to 78 kDa glucose-regulated protein;HSPA5 protein	GRP78;HSPA5	HSPA5 protein	P11021;B4DEF7;Q2KHP4	1	13	12	12	25.5	25.5	72.421			13										5.66e-30	0.537	1.2908	23.366	13	21238000	13358000	7880300
P60842	117	293;614	92	149	IPI00025491;IPI00409717;IPI00328328;IPI00924536;IPI00793328;IPI00790077;IPI00910691;IPI00792676;IPI00927069;IPI00927480;IPI00815667;IPI00794324;IPI00791914	IPI00025491;IPI00409717;IPI00328328;IPI00924536;IPI00793328;IPI00790077;IPI00910691;IPI00792676;IPI00927069;IPI00927480;IPI00815667;IPI00794324;IPI00791914	2;1;1;1;1;1;1;1;1;1;1;1;1	2;1;1;1;1;1;1;1;1;1;1;1;1	1;0;0;0;0;0;0;0;0;0;0;0;0	ATP-dependent RNA helicase eIF4A-1;Eukaryotic initiation factor 4A-I;cDNA FLJ78614, highly similar to Homo sapiens eukaryotic translation initiation factor 4A, isoform 1 (EIF4A1), mRNA;cDNA FLJ78244, highly similar to Homo sapiens eukaryotic translation initiation factor 4A, isoform 1 (EIF4A1), mRNA;cDNA FLJ58012, moderately similar to Eukaryotic initiation factor 4A-I (EC 3.6.1.-);cDNA FLJ58596,…	DDX2A;EIF4A;EIF4A1;DDX2B;EIF4A2;EIF4F;DKFZp566L241	Eukaryotic initiation factor 4A-I;Isoform 2 of Eukaryotic initiation factor 4A-II;Isoform 1 of Eukaryotic initiation factor 4A-II;41 kDa protein;26 kDa protein;25 kDa protein;cDNA FLJ57766, moderately similar to Eukaryotic initiation factor 4A-I;14 kDa pro	P60842;A8K088;A8K7F6;B4DKP9;B4DNH2;B4E047;Q59F68;Q14240-2;Q14240;Q14240-1;Q86WD0;B4E102;C9JM32;Q5JWW0;Q9NZR9;Q59GT8	13	2	2	1	7.6	3.7	46.153						2							0.00012904	0.61944	1.2986	48.642	2	2298300	1448700	849560
O15511-2	56	113;1019	47	110	IPI00007280;IPI00550234;IPI00640779;IPI00903330	IPI00007280;IPI00550234;IPI00640779;IPI00903330	2;2;2;2	2;2;2;2	2;2;2;2	Actin-related protein 2/3 complex subunit 5;Arp2/3 complex 16 kDa subunit	ARC16;ARPC5;RP1-127C7.3-004	Isoform 2 of Actin-related protein 2/3 complex subunit 5;Isoform 1 of Actin-related protein 2/3 complex subunit 5;Actin-related protein 2/3 complex subunit 5;Actin-related protein 2/3 complex subunit 5	O15511-2;O15511;O15511-1;B1ALC0;B3KTE1	4	2	2	2	13.6	13.6	16.631												3	0.0027618	0.60577	1.3238	7.9535	3	3677800	2164700	1513200
P22626-1	214	285;923			IPI00396378;IPI00916517;IPI00414696	IPI00396378;IPI00916517;IPI00414696	2;2;1	2;2;1	2;2;1	Heterogeneous nuclear ribonucleoproteins A2/B1;Putative uncharacterized protein HNRNPA2B1	HNRNPA2B1;HNRPA2B1	Isoform B1 of Heterogeneous nuclear ribonucleoproteins A2/B1;Putative uncharacterized protein HNRNPA2B1;Isoform A2 of Heterogeneous nuclear ribonucleoproteins A2/B1	P22626-1;P22626;B8ZZ37;P22626-2	3	2	2	2	6.8	6.8	37.429								2	1				0.03225	0.62514	1.3397	16.158	3	3938700	1140500	2798300
Q14165	129	626;646			IPI00029046	IPI00029046	2	2	2	Malectin	KIAA0152;MLEC	Malectin	Q14165	1	2	2	2	6.8	6.8	32.233									2				0.035527	0.89554	1.6938	48.114	2	1552500	1122000	430430
O43290	102	553;610			IPI00021417	IPI00021417	2	2	2	SNU66 homolog;Squamous cell carcinoma antigen recognized by T cells 1;U4/U6.U5 tri-snRNP-associated 110 kDa protein;U4/U6.U5 tri-snRNP-associated protein 1;cDNA FLJ53820, highly similar to U4/U6.U5 tri-snRNP-associated protein 1	SART1	U4/U6.U5 tri-snRNP-associated protein 1	O43290;B4DDH9	1	2	2	2	3.1	3.1	90.254		1						1					0.00023528	0.85954	1.9625	54.862	2	415910	204540	211370
P04792	118	536;1044			IPI00025512;IPI00924436;IPI00909453	IPI00025512;IPI00924436;IPI00909453	2;2;1	2;2;1	2;2;1	28 kDa heat shock protein;Estrogen-regulated 24 kDa protein;Heat shock 27 kDa protein;Heat shock protein beta-1;Stress-responsive protein 27;cDNA FLJ52243, highly similar to Heat-shock protein beta-1;Putative uncharacterized protein HSPB1	HSP27;HSP28;HSPB1	Heat shock protein beta-1;Putative uncharacterized protein HSPB1;cDNA FLJ52243, highly similar to Heat-shock protein beta-1	P04792;C9JLY6;B4DL87;C9J3N8	3	2	2	2	12.7	12.7	22.782							2						0.17233	0.96189	2.0741	7.8724	2	2476000	1048000	1428000
B4DR52	93	77;203	34;35	60;63	IPI00646240;IPI00794461;IPI00930174;IPI00930570;IPI00303133;IPI00020101;IPI00419833;IPI00152906;IPI00477495;IPI00018534;IPI00554798;IPI00815755;IPI00329665	IPI00646240;IPI00794461;IPI00930174;IPI00930570;IPI00303133;IPI00020101;IPI00419833;IPI00152906;IPI00477495;IPI00018534;IPI00554798;IPI00815755;IPI00329665	2;2;2;2;2;2;2;2;2;2;2;2;2	2;2;2;2;2;2;2;2;2;2;2;2;2	1;1;1;1;1;1;1;1;1;1;1;1;1	Histone H2B;Histone H2B type 1-N;Histone H2B.d;Histone H2B type 1-H;Histone H2B.j;Histone H2B type 1-C/E/F/G/I;Histone H2B.1 A;Histone H2B.a;Histone H2B.g;Histone H2B.h;Histone H2B.k;Histone H2B.l;HIRA-interacting protein 1;Histone H2B type 1-K;HIRA-interacting protein 2;Histone H2B type 1-D;Histone H2B.1 B;Histone H2B.b;Histone H2B type F-S;Histone H2B.s;Histone H2B type 1-L;Histone H2B.c;Histon…	H2BFD;HIST1H2BN;H2BFJ;HIST1H2BH;H2BFA;H2BFG;H2BFH;H2BFK;H2BFL;HIST1H2BC;HIST1H2BE;HIST1H2BF;HIST1H2BG;HIST1H2BI;hCG_1640484;hCG_1640985;hCG_1641780;hCG_1787353;hCG_1787365;H2BFT;HIRIP1;HIST1H2BK;H2BFB;HIRIP2;HIST1H2BD;H2BFS;H2BFC;HIST1H2BL;H2BFE;HIST1H2BM;HIST2H2BF	Histone H2B;Histone H2B type 1-N;histone cluster 2, H2bf isoform b;Histone H2B;Histone H2B type 1-H;histone cluster 1, H2bg;Histone H2B type 1-K;Histone H2B type 1-D;Histone H2B type F-S;Histone H2B type 1-L;Histone H2B type 1-M;HIST1H2BC protein;Histone H	B4DR52;Q99877;B4DLA9;A8K9J7;Q93079;B2R541;P62807;B2R4S9;O60814;P58876;P57053;Q99880;Q99879;Q0D2M2;Q5QNW6	13	2	2	1	14.5	5.4	18.041												2	5.88e-17	1.0391	2.3519	30.068	2	2890000	1274900	1615100
Q13765	113	131;364;691;858	91	895	IPI00797126;IPI00797259;IPI00023748;IPI00909970;IPI00012479	IPI00797126;IPI00797259;IPI00023748;IPI00909970	4;4;4;3;1	4;4;4;3;1	4;4;4;3;1	Alpha-NAC;Nascent polypeptide-associated complex subunit alpha;cDNA FLJ33331 fis, clone BRACE2000489, highly similar to Nascent polypeptide-associated complex subunit alpha;cDNA, FLJ92170, Homo sapiens nascent-polypeptide-associated complex alpha polypeptide (NACA), mRNA;HCG2016482, isoform CRA_b;Putative uncharacterized protein NACA;cDNA FLJ53704, moderately similar to Nascent polypeptide-associ…	HSD48;NACA;hCG_2016482	nascent polypeptide-associated complex alpha subunit isoform a;24 kDa protein;Nascent polypeptide-associated complex subunit alpha;cDNA FLJ53704, moderately similar to Nascent polypeptide-associated complex subunit alpha	Q13765;B2R4P8;B4DDI8	5	4	4	4	5.9	5.9	94.68							6		2	2		1	5.18e-45	1.6938	3.4854	37.567	11	14783000	4787600	9995900
